# Supplementary material for: Epigenetic loss of the RNA decapping enzyme NUDT16 mediates C-MYC activation in T-cell acute lymphoblastic leukemia
Source: Leukemia. 2017 Apr 11;31(7):1622–5. doi: 10.1038/leu.2017.99 (PMC5501321; doi:10.1038/leu.2017.99)
Supplement: Supplementary Table S1 [file leu201799x10.pdf]

**Supplementary Table 1.** B-values for the methylation status of the CpG dinucleotides located in the DCP2 and NUDT16 CpG island associated with the transcription start site of DCP2 and NUDT16 in the Sanger panel of cell lines

| Cell Line    | Tissue            | Cell Line Type                      | TargetID | UCSC_REFGENE_NAME | UCSC_REFGENE_GROUP | DCP2    |         |        |        |        |        |               |         | NUDT16  |         |         |        |        |        |               |      |      |      |  |  |
|--------------|-------------------|-------------------------------------|----------|-------------------|--------------------|---------|---------|--------|--------|--------|--------|---------------|---------|---------|---------|---------|--------|--------|--------|---------------|------|------|------|--|--|
|              |                   |                                     |          |                   |                    | TSS1500 | TSS1500 | TSS200 | TSS200 | TSS200 | TSS200 | 1stExon;5'UTR | 1stExon | TSS1500 | TSS1500 | TSS1500 | TSS200 | TSS200 | TSS200 | 5'UTR;1stExon | Body | Body |      |  |  |
|              |                   |                                     |          |                   |                    |         |         |        |        |        |        |               |         |         |         |         |        |        |        |               |      |      |      |  |  |
| SW13         | Adrenal Gland     | Adenocortical Carcinoma             |          |                   |                    | 0.01    | 0.08    | 0.07   | 0.10   | 0.07   | 0.08   | 0.04          | 0.05    | 0.27    | 0.24    | 0.13    | 0.03   | 0.33   | 0.06   | 0.04          | 0.01 | 0.36 | 0.53 |  |  |
| SK-N-AS      | Autonomic Ganglia | Neuroblastoma                       |          |                   |                    | 0.01    | 0.07    | 0.10   | 0.10   | 0.09   | 0.08   | 0.03          | 0.09    | 0.07    | 0.10    | 0.14    | 0.04   | 0.28   | 0.04   | 0.04          | 0.02 | 0.25 | 0.27 |  |  |
| SK-N-BE(2)   | Autonomic Ganglia | Neuroblastoma                       |          |                   |                    | 0.01    | 0.07    | 0.08   | 0.09   | 0.08   | 0.07   | 0.02          | 0.06    | 0.06    | 0.10    | 0.10    | 0.02   | 0.29   | 0.03   | 0.04          | 0.00 | 0.26 | 0.23 |  |  |
| SK-N-FI      | Autonomic Ganglia | Neuroblastoma                       |          |                   |                    | 0.01    | 0.10    | 0.07   | 0.11   | 0.07   | 0.08   | 0.02          | 0.06    | 0.03    | 0.07    | 0.07    | 0.02   | 0.32   | 0.04   | 0.06          | 0.01 | 0.30 | 0.35 |  |  |
| IMR-32       | Autonomic Ganglia | Neuroblastoma                       |          |                   |                    | 0.02    | 0.09    | 0.08   | 0.10   | 0.08   | 0.08   | 0.02          | 0.07    | 0.21    | 0.12    | 0.15    | 0.07   | 0.38   | 0.22   | 0.12          | 0.21 | 0.31 | 0.28 |  |  |
| KP-N-Si9S    | Autonomic Ganglia | Neuroblastoma                       |          |                   |                    | 0.01    | 0.06    | 0.08   | 0.10   | 0.09   | 0.05   | 0.02          | 0.07    | 0.04    | 0.12    | 0.10    | 0.02   | 0.32   | 0.03   | 0.05          | 0.01 | 0.27 | 0.21 |  |  |
| GOTO         | Autonomic Ganglia | Neuroblastoma                       |          |                   |                    | 0.03    | 0.12    | 0.09   | 0.12   | 0.06   | 0.07   | 0.03          | 0.06    | 0.10    | 0.10    | 0.10    | 0.03   | 0.29   | 0.05   | 0.04          | 0.02 | 0.29 | 0.24 |  |  |
| SK-N-SH      | Autonomic Ganglia | Neuroblastoma                       |          |                   |                    | 0.03    | 0.09    | 0.07   | 0.09   | 0.06   | 0.07   | 0.01          | 0.05    | 0.04    | 0.10    | 0.08    | 0.02   | 0.29   | 0.05   | 0.03          | 0.01 | 0.28 | 0.28 |  |  |
| BE2-M17      | Autonomic Ganglia | Neuroblastoma                       |          |                   |                    | 0.00    | 0.11    | 0.06   | 0.08   | 0.06   | 0.08   | 0.01          | 0.07    | 0.06    | 0.08    | 0.09    | 0.03   | 0.29   | 0.04   | 0.03          | 0.00 | 0.28 | 0.21 |  |  |
| MC-JXC       | Autonomic Ganglia | Neuroblastoma                       |          |                   |                    | 0.08    | 0.12    | 0.08   | 0.11   | 0.07   | 0.07   | 0.04          | 0.07    | 0.85    | 0.81    | 0.53    | 0.71   | 0.88   | 0.94   | 0.89          | 0.99 | 0.87 | 0.92 |  |  |
| NB69         | Autonomic Ganglia | Neuroblastoma                       |          |                   |                    | 0.04    | 0.12    | 0.08   | 0.10   | 0.07   | 0.08   | 0.02          | 0.06    | 0.05    | 0.09    | 0.08    | 0.03   | 0.29   | 0.05   | 0.04          | 0.01 | 0.32 | 0.24 |  |  |
| KELLY        | Autonomic Ganglia | Neuroblastoma                       |          |                   |                    | 0.02    | 0.11    | 0.08   | 0.10   | 0.07   | 0.08   | 0.03          | 0.07    | 0.06    | 0.09    | 0.08    | 0.03   | 0.29   | 0.04   | 0.04          | 0.02 | 0.31 | 0.24 |  |  |
| SK-N-DZ      | Autonomic Ganglia | Neuroblastoma                       |          |                   |                    | 0.00    | 0.11    | 0.08   | 0.10   | 0.07   | 0.08   | 0.02          | 0.07    | 0.05    | 0.09    | 0.10    | 0.03   | 0.29   | 0.04   | 0.05          | 0.01 | 0.29 | 0.23 |  |  |
| MHH-NB-11    | Autonomic Ganglia | Neuroblastoma                       |          |                   |                    | 0.07    | 0.10    | 0.07   | 0.11   | 0.07   | 0.07   | 0.05          | 0.06    | 0.05    | 0.10    | 0.08    | 0.03   | 0.31   | 0.05   | 0.03          | 0.01 | 0.31 | 0.24 |  |  |
| CHP-212      | Autonomic Ganglia | Neuroblastoma                       |          |                   |                    | 0.14    | 0.10    | 0.08   | 0.10   | 0.07   | 0.08   | 0.03          | 0.06    | 0.07    | 0.08    | 0.09    | 0.03   | 0.28   | 0.04   | 0.03          | 0.01 | 0.31 | 0.29 |  |  |
| ACN          | Autonomic Ganglia | Neuroblastoma                       |          |                   |                    | 0.02    | 0.15    | 0.08   | 0.11   | 0.09   | 0.09   | 0.05          | 0.09    | 0.08    | 0.12    | 0.10    | 0.03   | 0.25   | 0.05   | 0.08          | 0.00 | 0.18 | 0.24 |  |  |
| GI-ME-N      | Autonomic Ganglia | Neuroblastoma                       |          |                   |                    | 0.10    | 0.17    | 0.12   | 0.12   | 0.10   | 0.11   | 0.05          | 0.08    | 0.07    | 0.11    | 0.10    | 0.03   | 0.29   | 0.08   | 0.11          | 0.02 | 0.39 | 0.45 |  |  |
| NB12         | Autonomic Ganglia | Neuroblastoma                       |          |                   |                    | 0.00    | 0.08    | 0.08   | 0.11   | 0.07   | 0.09   | 0.08          | 0.06    | 0.68    | 0.68    | 0.51    | 0.53   | 0.67   | 0.72   | 0.70          | 0.65 | 0.57 | 0.44 |  |  |
| NB13         | Autonomic Ganglia | Neuroblastoma                       |          |                   |                    | 0.00    | 0.10    | 0.07   | 0.10   | 0.09   | 0.07   | 0.03          | 0.09    | 0.07    | 0.12    | 0.12    | 0.04   | 0.31   | 0.04   | 0.05          | 0.02 | 0.33 | 0.34 |  |  |
| NBSUSSR      | Autonomic Ganglia | Neuroblastoma                       |          |                   |                    | 0.76    | 0.28    | 0.38   | 0.30   | 0.07   | 0.06   | 0.07          | 0.06    | 0.61    | 0.65    | 0.54    | 0.51   | 0.62   | 0.64   | 0.65          | 0.60 | 0.52 | 0.71 |  |  |
| NB17         | Autonomic Ganglia | Neuroblastoma                       |          |                   |                    | 0.00    | 0.11    | 0.08   | 0.11   | 0.08   | 0.07   | 0.01          | 0.07    | 0.45    | 0.32    | 0.25    | 0.22   | 0.48   | 0.44   | 0.21          | 0.32 | 0.43 | 0.44 |  |  |
| NB14         | Autonomic Ganglia | Neuroblastoma                       |          |                   |                    | 0.00    | 0.10    | 0.09   | 0.09   | 0.10   | 0.09   | 0.04          | 0.08    | 0.06    | 0.10    | 0.15    | 0.04   | 0.30   | 0.05   | 0.05          | 0.02 | 0.27 | 0.23 |  |  |
| NB5          | Autonomic Ganglia | Neuroblastoma                       |          |                   |                    | 0.02    | 0.07    | 0.08   | 0.12   | 0.07   | 0.08   | 0.04          | 0.08    | 0.06    | 0.13    | 0.12    | 0.04   | 0.30   | 0.07   | 0.04          | 0.01 | 0.29 | 0.33 |  |  |
| KP-N-YS      | Autonomic Ganglia | Neuroblastoma                       |          |                   |                    | 0.01    | 0.10    | 0.10   | 0.11   | 0.08   | 0.08   | 0.02          | 0.07    | 0.37    | 0.24    | 0.19    | 0.16   | 0.41   | 0.34   | 0.13          | 0.26 | 0.39 | 0.41 |  |  |
| NB7          | Autonomic Ganglia | Neuroblastoma                       |          |                   |                    | 0.00    | 0.11    | 0.09   | 0.11   | 0.08   | 0.07   | 0.03          | 0.07    | 0.07    | 0.10    | 0.12    | 0.04   | 0.31   | 0.05   | 0.04          | 0.01 | 0.26 | 0.22 |  |  |
| CHP-134      | Autonomic Ganglia | Neuroblastoma                       |          |                   |                    | 0.03    | 0.10    | 0.08   | 0.09   | 0.07   | 0.08   | 0.03          | 0.07    | 0.08    | 0.10    | 0.09    | 0.04   | 0.32   | 0.04   | 0.03          | 0.02 | 0.31 | 0.47 |  |  |
| LAN-6        | Autonomic Ganglia | Neuroblastoma                       |          |                   |                    | 0.00    | 0.11    | 0.07   | 0.10   | 0.06   | 0.06   | 0.03          | 0.06    | 0.05    | 0.08    | 0.14    | 0.03   | 0.31   | 0.05   | 0.03          | 0.01 | 0.30 | 0.28 |  |  |
| NB10         | Autonomic Ganglia | Neuroblastoma                       |          |                   |                    | 0.00    | 0.10    | 0.08   | 0.08   | 0.06   | 0.07   | 0.03          | 0.06    | 0.04    | 0.11    | 0.11    | 0.03   | 0.29   | 0.04   | 0.03          | 0.01 | 0.30 | 0.28 |  |  |
| IMR-5        | Autonomic Ganglia | Neuroblastoma                       |          |                   |                    | 0.10    | 0.11    | 0.07   | 0.11   | 0.07   | 0.07   | 0.02          | 0.07    | 0.39    | 0.27    | 0.25    | 0.21   | 0.43   | 0.37   | 0.31          | 0.36 | 0.35 | 0.34 |  |  |
| NB6          | Autonomic Ganglia | Neuroblastoma                       |          |                   |                    | 0.01    | 0.10    | 0.07   | 0.11   | 0.06   | 0.07   | 0.02          | 0.07    | 0.05    | 0.10    | 0.10    | 0.02   | 0.28   | 0.04   | 0.03          | 0.01 | 0.28 | 0.23 |  |  |
| CHP-126      | Autonomic Ganglia | Neuroblastoma                       |          |                   |                    | 0.23    | 0.13    | 0.08   | 0.13   | 0.10   | 0.09   | 0.04          | 0.09    | 0.11    | 0.13    | 0.15    | 0.04   | 0.31   | 0.08   | 0.08          | 0.02 | 0.30 | 0.21 |  |  |
| KP-N-RT-BM-1 | Autonomic Ganglia | Neuroblastoma                       |          |                   |                    | 0.00    | 0.09    | 0.07   | 0.09   | 0.06   | 0.06   | 0.02          | 0.04    | 0.67    | 0.60    | 0.45    | 0.49   | 0.58   | 0.59   | 0.61          | 0.60 | 0.51 | 0.63 |  |  |
| KP-N-YN      | Autonomic Ganglia | Neuroblastoma                       |          |                   |                    | 0.02    | 0.15    | 0.08   | 0.10   | 0.07   | 0.07   | 0.03          | 0.07    | 0.06    | 0.09    | 0.08    | 0.03   | 0.30   | 0.04   | 0.09          | 0.00 | 0.28 | 0.26 |  |  |
| SIMA         | Autonomic Ganglia | Neuroblastoma                       |          |                   |                    | 0.01    | 0.09    | 0.08   | 0.10   | 0.06   | 0.06   | 0.03          | 0.04    | 0.04    | 0.07    | 0.08    | 0.03   | 0.29   | 0.05   | 0.04          | 0.01 | 0.26 | 0.21 |  |  |
| NH-12        | Autonomic Ganglia | Neuroblastoma                       |          |                   |                    | 0.03    | 0.10    | 0.08   | 0.10   | 0.06   | 0.07   | 0.02          | 0.05    | 0.05    | 0.09    | 0.07    | 0.02   | 0.28   | 0.03   | 0.02          | 0.00 | 0.38 | 0.42 |  |  |
| TGW          | Autonomic Ganglia | Neuroblastoma                       |          |                   |                    | 0.01    | 0.12    | 0.08   | 0.10   | 0.08   | 0.09   | 0.04          | 0.07    | 0.38    | 0.19    | 0.15    | 0.08   | 0.41   | 0.17   | 0.18          | 0.17 | 0.32 | 0.35 |  |  |
| NB1          | Autonomic Ganglia | Neuroblastoma                       |          |                   |                    | 0.00    | 0.13    | 0.09   | 0.09   | 0.08   | 0.09   | 0.03          | 0.08    | 0.29    | 0.15    | 0.10    | 0.03   | 0.32   | 0.06   | 0.07          | 0.01 | 0.31 | 0.26 |  |  |
| EGI-1        | Biliary Tract     | Bile Duct Adenocarcinoma            |          |                   |                    | 0.27    | 0.10    | 0.10   | 0.10   | 0.06   | 0.08   | 0.07          | 0.07    | 0.06    | 0.12    | 0.11    | 0.03   | 0.03   | 0.04   | 0.03          | 0.01 | 0.08 | 0.36 |  |  |
| ETK-1        | Biliary Tract     | Bile Duct Adenocarcinoma            |          |                   |                    | 0.03    | 0.10    | 0.06   | 0.09   | 0.06   | 0.06   | 0.04          | 0.05    | 0.05    | 0.11    | 0.10    | 0.02   | 0.06   | 0.04   | 0.02          | 0.01 | 0.04 | 0.20 |  |  |
| HUCCT1       | Biliary Tract     | Bile Duct Carcinoma                 |          |                   |                    | 0.06    | 0.13    | 0.09   | 0.10   | 0.08   | 0.10   | 0.02          | 0.10    | 0.06    | 0.10    | 0.11    | 0.02   | 0.04   | 0.04   | 0.05          | 0.00 | 0.03 | 0.17 |  |  |
| TGBC1TKB     | Biliary Tract     | Gallbladder Adenocarcinoma          |          |                   |                    | 0.00    | 0.08    | 0.07   | 0.10   | 0.06   | 0.06   | 0.03          | 0.04    | 0.05    | 0.08    | 0.08    | 0.03   | 0.02   | 0.03   | 0.03          | 0.00 | 0.01 | 0.11 |  |  |
| TGBC24TKB    | Biliary Tract     | Gallbladder Carcinoma               |          |                   |                    | 0.02    | 0.10    | 0.08   | 0.12   | 0.07   | 0.07   | 0.06          | 0.06    | 0.06    | 0.12    | 0.10    | 0.04   | 0.04   | 0.05   | 0.05          | 0.01 | 0.07 | 0.13 |  |  |
| CAL-29       | Bladder           | Bladder Transitional Cell Carcinoma |          |                   |                    | 0.02    | 0.13    | 0.09   | 0.11   | 0.09   | 0.08   | 0.04          | 0.08    | 0.06    | 0.13    | 0.11    | 0.03   | 0.05   | 0.04   | 0.04          | 0.01 | 0.03 | 0.19 |  |  |
| SCI-1        | Blood             | B Cell Lymphoma                     |          |                   |                    | 0.08    | 0.13    | 0.09   | 0.11   | 0.08   | 0.10   | 0.03          | 0.07    | 0.08    | 0.13    | 0.11    | 0.03   | 0.34   | 0.06   | 0.09          | 0.01 | 0.51 | 0.32 |  |  |
| KARPAS-1106P | Blood             | B Cell Lymphoma                     |          |                   |                    | 0.37    | 0.16    | 0.09   | 0.10   | 0.06   | 0.08   | 0.03          | 0.07    | 0.05    | 0.11    | 0.08    | 0.02   | 0.26   | 0.04   | 0.05          | 0.01 | 0.29 | 0.61 |  |  |
| RCH-ACV      | Blood             | B Cell Precursor Leukemia           |          |                   |                    | 0.52    | 0.17    | 0.14   | 0.11   | 0.09   | 0.10   | 0.03          | 0.08    | 0.24    | 0.19    | 0.12    | 0.04   |        |        |               |      |      |      |  |  |

|               |                        |                                | TargetID | UCSC_REFGENE_NAME |         |        |        |        |        |              |         | UCSC_REFGENE_GROUP |         |         |        |        |        |        |              |      |      |  |  |  |  |  |  |  |  |  |  |  |  |
|---------------|------------------------|--------------------------------|----------|-------------------|---------|--------|--------|--------|--------|--------------|---------|--------------------|---------|---------|--------|--------|--------|--------|--------------|------|------|--|--|--|--|--|--|--|--|--|--|--|--|
|               |                        |                                |          | DCP2              |         |        |        |        |        |              |         | NUDT16             |         |         |        |        |        |        |              |      |      |  |  |  |  |  |  |  |  |  |  |  |  |
|               |                        |                                |          | TSS1500           | TSS1500 | TSS200 | TSS200 | TSS200 | TSS200 | 1stExon;5UTR | 1stExon | TSS1500            | TSS1500 | TSS1500 | TSS200 | TSS200 | TSS200 | TSS200 | 5UTR;1stExon | Body | Body |  |  |  |  |  |  |  |  |  |  |  |  |
| Cell Line     | Tissue                 | Cell Line Type                 |          |                   |         |        |        |        |        |              |         |                    |         |         |        |        |        |        |              |      |      |  |  |  |  |  |  |  |  |  |  |  |  |
| EVSA-T        | Breast                 | Breast Carcinoma               |          | 0.09              | 0.10    | 0.08   | 0.09   | 0.07   | 0.08   | 0.04         | 0.06    | 0.40               | 0.33    | 0.31    | 0.03   | 0.46   | 0.22   | 0.09   | 0.06         | 0.41 | 0.33 |  |  |  |  |  |  |  |  |  |  |  |  |
| MDA-MB-361    | Breast                 | Breast Carcinoma               |          | 0.04              | 0.09    | 0.06   | 0.10   | 0.06   | 0.07   | 0.04         | 0.04    | 0.04               | 0.08    | 0.07    | 0.03   | 0.29   | 0.03   | 0.03   | 0.01         | 0.30 | 0.22 |  |  |  |  |  |  |  |  |  |  |  |  |
| HCC1569       | Breast                 | Breast Carcinoma               |          | 0.63              | 0.29    | 0.48   | 0.46   | 0.09   | 0.08   | 0.04         | 0.07    | 0.05               | 0.09    | 0.12    | 0.03   | 0.28   | 0.05   | 0.37   | 0.01         | 0.34 | 0.28 |  |  |  |  |  |  |  |  |  |  |  |  |
| MRK-NU-1      | Breast                 | Breast Carcinoma               |          | 0.01              | 0.15    | 0.09   | 0.10   | 0.08   | 0.09   | 0.05         | 0.08    | 0.19               | 0.15    | 0.11    | 0.02   | 0.37   | 0.11   | 0.13   | 0.07         | 0.34 | 0.36 |  |  |  |  |  |  |  |  |  |  |  |  |
| MDA-MB-415    | Breast                 | Breast Carcinoma               |          | 0.03              | 0.10    | 0.08   | 0.10   | 0.07   | 0.09   | 0.03         | 0.07    | 0.06               | 0.06    | 0.07    | 0.02   | 0.02   | 0.03   | 0.01   | 0.00         | 0.12 | 0.16 |  |  |  |  |  |  |  |  |  |  |  |  |
| HS-578-T      | Breast                 | Breast Carcinoma               |          | 0.00              | 0.13    | 0.08   | 0.10   | 0.08   | 0.08   | 0.03         | 0.07    | 0.05               | 0.08    | 0.10    | 0.03   | 0.31   | 0.04   | 0.07   | 0.01         | 0.25 | 0.25 |  |  |  |  |  |  |  |  |  |  |  |  |
| YMB-1-E       | Breast                 | Breast Carcinoma               |          | 0.04              | 0.07    | 0.06   | 0.09   | 0.06   | 0.06   | 0.04         | 0.05    | 0.04               | 0.08    | 0.07    | 0.02   | 0.27   | 0.04   | 0.03   | 0.01         | 0.26 | 0.20 |  |  |  |  |  |  |  |  |  |  |  |  |
| T47D          | Breast                 | Breast Ductal Carcinoma        |          | 0.01              | 0.08    | 0.07   | 0.08   | 0.05   | 0.05   | 0.00         | 0.05    | 0.04               | 0.07    | 0.07    | 0.01   | 0.10   | 0.01   | 0.02   | 0.00         | 0.19 | 0.14 |  |  |  |  |  |  |  |  |  |  |  |  |
| BT-549        | Breast                 | Breast Ductal Carcinoma        |          | 0.01              | 0.09    | 0.10   | 0.10   | 0.06   | 0.06   | 0.02         | 0.06    | 0.04               | 0.08    | 0.08    | 0.02   | 0.29   | 0.03   | 0.03   | 0.01         | 0.28 | 0.20 |  |  |  |  |  |  |  |  |  |  |  |  |
| MDA-MB-134-VI | Breast                 | Breast Ductal Carcinoma        |          | 0.03              | 0.07    | 0.06   | 0.09   | 0.05   | 0.05   | 0.01         | 0.05    | 0.04               | 0.08    | 0.08    | 0.02   | 0.24   | 0.02   | 0.02   | 0.01         | 0.24 | 0.18 |  |  |  |  |  |  |  |  |  |  |  |  |
| HCC38         | Breast                 | Breast Ductal Carcinoma        |          | 0.21              | 0.12    | 0.07   | 0.09   | 0.07   | 0.05   | 0.02         | 0.05    | 0.05               | 0.08    | 0.08    | 0.03   | 0.29   | 0.04   | 0.07   | 0.01         | 0.29 | 0.27 |  |  |  |  |  |  |  |  |  |  |  |  |
| BT-474        | Breast                 | Breast Ductal Carcinoma        |          | 0.03              | 0.12    | 0.06   | 0.09   | 0.05   | 0.05   | 0.03         | 0.05    | 0.06               | 0.09    | 0.08    | 0.02   | 0.27   | 0.06   | 0.05   | 0.01         | 0.27 | 0.25 |  |  |  |  |  |  |  |  |  |  |  |  |
| UACC-812      | Breast                 | Breast Ductal Carcinoma        |          | 0.02              | 0.09    | 0.08   | 0.09   | 0.08   | 0.06   | 0.02         | 0.07    | 0.06               | 0.11    | 0.09    | 0.03   | 0.31   | 0.04   | 0.04   | 0.01         | 0.26 | 0.21 |  |  |  |  |  |  |  |  |  |  |  |  |
| CAL-148       | Breast                 | Breast Ductal Carcinoma        |          | 0.01              | 0.08    | 0.08   | 0.09   | 0.06   | 0.06   | 0.02         | 0.05    | 0.03               | 0.08    | 0.08    | 0.02   | 0.28   | 0.03   | 0.03   | 0.01         | 0.26 | 0.20 |  |  |  |  |  |  |  |  |  |  |  |  |
| BT-483        | Breast                 | Breast Ductal Carcinoma        |          | 0.01              | 0.08    | 0.07   | 0.08   | 0.05   | 0.06   | 0.02         | 0.04    | 0.04               | 0.09    | 0.07    | 0.00   | 0.27   | 0.02   | 0.02   | 0.00         | 0.30 | 0.23 |  |  |  |  |  |  |  |  |  |  |  |  |
| EFM-19        | Breast                 | Breast Ductal Carcinoma        |          | 0.03              | 0.08    | 0.07   | 0.09   | 0.06   | 0.06   | 0.03         | 0.04    | 0.05               | 0.07    | 0.08    | 0.02   | 0.24   | 0.03   | 0.03   | 0.00         | 0.30 | 0.23 |  |  |  |  |  |  |  |  |  |  |  |  |
| UACC-893      | Breast                 | Breast Ductal Carcinoma        |          | 0.01              | 0.10    | 0.08   | 0.09   | 0.07   | 0.04   | 0.05         | 0.06    | 0.07               | 0.10    | 0.14    | 0.03   | 0.31   | 0.03   | 0.04   | 0.01         | 0.28 | 0.25 |  |  |  |  |  |  |  |  |  |  |  |  |
| ZR-75-30      | Breast                 | Breast Ductal Carcinoma        |          | 0.00              | 0.09    | 0.09   | 0.12   | 0.07   | 0.07   | 0.03         | 0.06    | 0.06               | 0.11    | 0.11    | 0.02   | 0.25   | 0.03   | 0.03   | 0.01         | 0.35 | 0.36 |  |  |  |  |  |  |  |  |  |  |  |  |
| MFM-223       | Breast                 | Breast Ductal Carcinoma        |          | 0.90              | 0.49    | 0.47   | 0.49   | 0.44   | 0.47   | 0.59         | 0.38    | 0.06               | 0.11    | 0.14    | 0.03   | 0.30   | 0.04   | 0.03   | 0.01         | 0.30 | 0.50 |  |  |  |  |  |  |  |  |  |  |  |  |
| HCC2157       | Breast                 | Breast Ductal Carcinoma        |          | 0.01              | 0.09    | 0.07   | 0.10   | 0.05   | 0.07   | 0.02         | 0.04    | 0.04               | 0.10    | 0.09    | 0.02   | 0.28   | 0.04   | 0.31   | 0.00         | 0.33 | 0.32 |  |  |  |  |  |  |  |  |  |  |  |  |
| HCC70         | Breast                 | Breast Ductal Carcinoma        |          | 0.16              | 0.13    | 0.15   | 0.14   | 0.07   | 0.08   | 0.03         | 0.08    | 0.06               | 0.12    | 0.14    | 0.04   | 0.26   | 0.05   | 0.04   | 0.01         | 0.25 | 0.20 |  |  |  |  |  |  |  |  |  |  |  |  |
| HCC1954       | Breast                 | Breast Ductal Carcinoma        |          | 0.21              | 0.09    | 0.10   | 0.12   | 0.06   | 0.09   | 0.03         | 0.08    | 0.10               | 0.10    | 0.14    | 0.02   | 0.32   | 0.04   | 0.04   | 0.02         | 0.30 | 0.25 |  |  |  |  |  |  |  |  |  |  |  |  |
| HCC1187       | Breast                 | Breast Ductal Carcinoma        |          | 0.04              | 0.13    | 0.18   | 0.17   | 0.08   | 0.08   | 0.03         | 0.07    | 0.09               | 0.15    | 0.17    | 0.03   | 0.30   | 0.05   | 0.04   | 0.01         | 0.33 | 0.31 |  |  |  |  |  |  |  |  |  |  |  |  |
| HCC2218       | Breast                 | Breast Ductal Carcinoma        |          | 0.01              | 0.10    | 0.07   | 0.10   | 0.07   | 0.08   | 0.03         | 0.06    | 0.05               | 0.10    | 0.09    | 0.03   | 0.30   | 0.04   | 0.04   | 0.01         | 0.29 | 0.19 |  |  |  |  |  |  |  |  |  |  |  |  |
| MDA-MB-157    | Breast                 | Breast Ductal Carcinoma        |          | 0.01              | 0.10    | 0.09   | 0.11   | 0.06   | 0.05   | 0.04         | 0.05    | 0.08               | 0.07    | 0.07    | 0.02   | 0.28   | 0.03   | 0.03   | 0.02         | 0.22 | 0.31 |  |  |  |  |  |  |  |  |  |  |  |  |
| HCC1599       | Breast                 | Breast Ductal Carcinoma        |          | 0.00              | 0.10    | 0.08   | 0.09   | 0.06   | 0.06   | 0.02         | 0.06    | 0.33               | 0.21    | 0.22    | 0.05   | 0.38   | 0.22   | 0.08   | 0.10         | 0.33 | 0.32 |  |  |  |  |  |  |  |  |  |  |  |  |
| HCC202        | Breast                 | Breast Ductal Carcinoma        |          | 0.01              | 0.10    | 0.07   | 0.08   | 0.06   | 0.05   | 0.02         | 0.04    | 0.05               | 0.07    | 0.07    | 0.02   | 0.31   | 0.03   | 0.03   | 0.01         | 0.30 | 0.24 |  |  |  |  |  |  |  |  |  |  |  |  |
| HCC1500       | Breast                 | Breast Ductal Carcinoma        |          | 0.03              | 0.12    | 0.08   | 0.09   | 0.06   | 0.09   | 0.02         | 0.05    | 0.04               | 0.08    | 0.06    | 0.02   | 0.28   | 0.04   | 0.03   | 0.01         | 0.29 | 0.23 |  |  |  |  |  |  |  |  |  |  |  |  |
| DU-4475       | Breast                 | Breast Ductal Carcinoma        |          | 0.00              | 0.11    | 0.07   | 0.08   | 0.06   | 0.07   | 0.03         | 0.04    | 0.03               | 0.07    | 0.06    | 0.01   | 0.02   | 0.03   | 0.02   | 0.01         | 0.01 | 0.10 |  |  |  |  |  |  |  |  |  |  |  |  |
| HCC1419       | Breast                 | Breast Ductal Carcinoma        |          | 0.01              | 0.07    | 0.08   | 0.10   | 0.08   | 0.08   | 0.03         | 0.07    | 0.06               | 0.11    | 0.10    | 0.02   | 0.32   | 0.03   | 0.03   | 0.00         | 0.29 | 0.26 |  |  |  |  |  |  |  |  |  |  |  |  |
| HCC1395       | Breast                 | Breast Ductal Carcinoma        |          | 0.02              | 0.09    | 0.07   | 0.08   | 0.06   | 0.07   | 0.01         | 0.03    | 0.47               | 0.49    | 0.23    | 0.04   | 0.42   | 0.33   | 0.19   | 0.33         | 0.40 | 0.61 |  |  |  |  |  |  |  |  |  |  |  |  |
| HCC1143       | Breast                 | Breast Ductal Carcinoma        |          | 0.01              | 0.14    | 0.09   | 0.12   | 0.08   | 0.11   | 0.05         | 0.08    | 0.06               | 0.10    | 0.08    | 0.03   | 0.30   | 0.05   | 0.08   | 0.01         | 0.28 | 0.23 |  |  |  |  |  |  |  |  |  |  |  |  |
| HCC1937       | Breast                 | Breast Ductal Carcinoma        |          | 0.27              | 0.15    | 0.09   | 0.11   | 0.09   | 0.09   | 0.04         | 0.08    | 0.06               | 0.11    | 0.10    | 0.02   | 0.26   | 0.05   | 0.08   | 0.01         | 0.29 | 0.31 |  |  |  |  |  |  |  |  |  |  |  |  |
| HCC1806       | Breast                 | Breast Squamous Cell Carcinoma |          | 0.01              | 0.12    | 0.11   | 0.14   | 0.09   | 0.10   | 0.05         | 0.10    | 0.08               | 0.14    | 0.19    | 0.04   | 0.24   | 0.06   | 0.05   | 0.02         | 0.31 | 0.23 |  |  |  |  |  |  |  |  |  |  |  |  |
| MDA-MB-330    | Breast                 | Mixed                          |          | 0.00              | 0.12    | 0.08   | 0.11   | 0.08   | 0.09   | 0.04         | 0.08    | 0.05               | 0.13    | 0.10    | 0.02   | 0.32   | 0.05   | 0.08   | 0.01         | 0.32 | 0.39 |  |  |  |  |  |  |  |  |  |  |  |  |
| CS1           | Cartilage              | Ns                             |          | 0.02              | 0.14    | 0.15   | 0.12   | 0.09   | 0.08   | 0.05         | 0.07    | 0.05               | 0.10    | 0.12    | 0.02   | 0.33   | 0.05   | 0.08   | 0.01         | 0.24 | 0.25 |  |  |  |  |  |  |  |  |  |  |  |  |
| U251          | Central Nervous System | Astrocytoma                    |          | 0.02              | 0.07    | 0.07   | 0.06   | 0.05   | 0.05   | 0.01         | 0.05    | 0.05               | 0.08    | 0.07    | 0.02   | 0.28   | 0.03   | 0.04   | 0.01         | 0.34 | 0.46 |  |  |  |  |  |  |  |  |  |  |  |  |
| SF295         | Central Nervous System | Astrocytoma                    |          | 0.02              | 0.08    | 0.07   | 0.09   | 0.05   | 0.06   | 0.02         | 0.05    | 0.03               | 0.08    | 0.06    | 0.01   | 0.20   | 0.03   | 0.02   | 0.01         | 0.03 | 0.20 |  |  |  |  |  |  |  |  |  |  |  |  |
| T98G          | Central Nervous System | Astrocytoma                    |          | 0.26              | 0.13    | 0.09   | 0.12   | 0.07   | 0.08   | 0.02         | 0.08    | 0.08               | 0.10    | 0.09    | 0.02   | 0.27   | 0.03   | 0.05   | 0.01         | 0.14 | 0.21 |  |  |  |  |  |  |  |  |  |  |  |  |
| LN-18         | Central Nervous System | Astrocytoma                    |          | 0.00              | 0.07    | 0.10   | 0.11   | 0.07   | 0.08   | 0.02         | 0.07    | 0.06               | 0.09    | 0.09    | 0.02   | 0.28   | 0.02   | 0.03   | 0.01         | 0.13 | 0.18 |  |  |  |  |  |  |  |  |  |  |  |  |
| D-336MG       | Central Nervous System | Astrocytoma                    |          | 0.01              | 0.11    | 0.09   | 0.11   | 0.08   | 0.09   | 0.04         | 0.06    | 0.06               | 0.10    | 0.12    | 0.04   | 0.12   | 0.04   | 0.04   | 0.01         | 0.04 | 0.15 |  |  |  |  |  |  |  |  |  |  |  |  |
| NO-10         | Central Nervous System | Astrocytoma                    |          | 0.17              | 0.11    | 0.09   | 0.09   | 0.07   | 0.07   | 0.03         | 0.07    | 0.04               | 0.09    | 0.10    | 0.02   | 0.29   | 0.05   | 0.04   | 0.01         | 0.32 | 0.24 |  |  |  |  |  |  |  |  |  |  |  |  |
| NO-11         | Central Nervous System | Astrocytoma                    |          | 0.02              | 0.10    | 0.07   | 0.10   | 0.07   | 0.08   | 0.04         | 0.05    | 0.06               | 0.07    | 0.10    | 0.01   | 0.30   | 0.03   | 0.02   | 0.01         | 0.44 | 0.44 |  |  |  |  |  |  |  |  |  |  |  |  |
| KINGS-1       | Central Nervous System | Astrocytoma                    |          | 0.03              | 0.10    | 0.08   | 0.10   | 0.08   | 0.06   | 0.03         | 0.06    | 0.05               | 0.11    | 0.12    | 0.02   | 0.16   | 0.04   | 0.03   | 0.02         | 0.11 | 0.18 |  |  |  |  |  |  |  |  |  |  |  |  |
| D-263MG       | Central Nervous System | Astrocytoma                    |          | 0.02              | 0.10    | 0.09   | 0.09   | 0.08   | 0.07   | 0.03         | 0.06    | 0.06               | 0.10    | 0.09    | 0.02   | 0.31   | 0.06   | 0.03   | 0.01         | 0.21 | 0.23 |  |  |  |  |  |  |  |  |  |  |  |  |
| D-247MG       | Central Nervous System | Astrocytoma                    |          | 0.02              | 0.11    | 0.07   | 0.10   | 0.06   | 0.07   | 0.03         | 0.05    | 0.05               | 0.08    | 0.08    | 0.03   | 0.26   | 0.04   | 0.03   | 0.01         | 0.14 | 0.21 |  |  |  |  |  |  |  |  |  |  |  |  |
| D-502MG       | Central Nervous System | Astrocytoma                    |          | 0.02              | 0.10    | 0.09   | 0.12   | 0.08   | 0.08   | 0.05         | 0.06    | 0.06               | 0.12    | 0.13    | 0.03   | 0.24   | 0.06   | 0.03   | 0.01         | 0.22 | 0.26 |  |  |  |  |  |  |  |  |  |  |  |  |
| D-392MG       | Central Nervous System | Astrocytoma                    |          | 0.01              | 0.12    | 0.09   | 0.10   |        |        |              |         |                    |         |         |        |        |        |        |              |      |      |  |  |  |  |  |  |  |  |  |  |  |  |

|           |                                             |                                                              | TargetID |         | UCSC_REFGENE_NAME |        |        |        |        |              |         |         | UCSC_REFGENE_GROUP |         |        |        |        |        |              |      |      |         |         |         |        |        |        |              |      |      |      |      |
|-----------|---------------------------------------------|--------------------------------------------------------------|----------|---------|-------------------|--------|--------|--------|--------|--------------|---------|---------|--------------------|---------|--------|--------|--------|--------|--------------|------|------|---------|---------|---------|--------|--------|--------|--------------|------|------|------|------|
|           |                                             |                                                              |          |         | DCP2              |        |        |        |        |              |         |         | NUDT16             |         |        |        |        |        |              |      |      |         |         |         |        |        |        |              |      |      |      |      |
|           |                                             |                                                              |          |         |                   |        |        |        |        |              |         |         |                    |         |        |        |        |        |              |      |      |         |         |         |        |        |        |              |      |      |      |      |
| Cell Line | Tissue                                      | Cell Line Type                                               | TSS1500  | TSS1500 | TSS200            | TSS200 | TSS200 | TSS200 | TSS200 | 1stExon:5UTR | 1stExon | TSS1500 | TSS1500            | TSS1500 | TSS200 | TSS200 | TSS200 | TSS200 | 5UTR:1stExon | Body | Body | TSS1500 | TSS1500 | TSS1500 | TSS200 | TSS200 | TSS200 | 5UTR:1stExon | Body | Body |      |      |
| OMC-1     | Cervix                                      | Cervix Squamous Cell Carcinoma                               | 0.11     | 0.13    | 0.09              | 0.11   | 0.07   | 0.09   | 0.04   | 0.08         |         | 0.06    | 0.11               | 0.12    | 0.03   | 0.08   | 0.05   | 0.04   | 0.01         | 0.24 | 0.24 | 0.19    | 0.18    | 0.11    | 0.03   | 0.07   | 0.06   | 0.05         | 0.01 | 0.18 | 0.34 |      |
| SIHA      | Cervix                                      | Cervix Squamous Cell Carcinoma                               | 0.33     | 0.13    | 0.08              | 0.12   | 0.08   | 0.11   | 0.03   | 0.07         |         | 0.19    | 0.18               | 0.11    | 0.03   | 0.07   | 0.06   | 0.05   | 0.01         | 0.37 | 0.54 | 0.19    | 0.18    | 0.11    | 0.03   | 0.07   | 0.06   | 0.05         | 0.01 | 0.18 | 0.34 |      |
| CA-SKI    | Cervix                                      | Cervix Squamous Cell Carcinoma                               | 0.73     | 0.61    | 0.47              | 0.42   | 0.10   | 0.08   | 0.08   | 0.09         |         | 0.16    | 0.14               | 0.10    | 0.03   | 0.25   | 0.07   | 0.07   | 0.01         | 0.37 | 0.54 | 0.19    | 0.18    | 0.11    | 0.03   | 0.07   | 0.06   | 0.05         | 0.01 | 0.18 | 0.34 |      |
| HT-29     | Colon                                       | Colon Adenocarcinoma                                         | 0.04     | 0.09    | 0.06              | 0.07   | 0.05   | 0.05   | 0.02   | 0.05         |         | 0.03    | 0.06               | 0.07    | 0.02   | 0.02   | 0.01   | 0.01   | 0.01         | 0.04 | 0.25 | 0.03    | 0.06    | 0.08    | 0.02   | 0.24   | 0.01   | 0.03         | 0.00 | 0.21 | 0.16 |      |
| HCT-15    | Colon                                       | Colon Adenocarcinoma                                         | 0.55     | 0.08    | 0.07              | 0.07   | 0.04   | 0.06   | 0.02   | 0.04         |         | 0.03    | 0.06               | 0.08    | 0.02   | 0.24   | 0.01   | 0.03   | 0.00         | 0.21 | 0.16 | 0.03    | 0.06    | 0.08    | 0.02   | 0.24   | 0.01   | 0.03         | 0.00 | 0.21 | 0.16 |      |
| COLO-205  | Colon                                       | Colon Adenocarcinoma                                         | 0.01     | 0.07    | 0.07              | 0.09   | 0.06   | 0.07   | 0.02   | 0.05         |         | 0.05    | 0.08               | 0.08    | 0.01   | 0.01   | 0.03   | 0.02   | 0.00         | 0.02 | 0.10 | 0.04    | 0.07    | 0.06    | 0.01   | 0.28   | 0.01   | 0.02         | 0.00 | 0.26 | 0.17 |      |
| KM12      | Colon                                       | Colon Adenocarcinoma                                         | 0.16     | 0.05    | 0.06              | 0.07   | 0.04   | 0.05   | 0.02   | 0.05         |         | 0.04    | 0.07               | 0.06    | 0.01   | 0.28   | 0.01   | 0.02   | 0.00         | 0.26 | 0.17 | 0.04    | 0.07    | 0.06    | 0.01   | 0.28   | 0.01   | 0.02         | 0.00 | 0.26 | 0.17 |      |
| SW48      | Colon                                       | Colon Adenocarcinoma                                         | 0.06     | 0.05    | 0.06              | 0.07   | 0.04   | 0.05   | 0.01   | 0.05         |         | 0.04    | 0.07               | 0.11    | 0.00   | 0.21   | 0.02   | 0.02   | 0.00         | 0.20 | 0.32 | 0.04    | 0.11    | 0.09    | 0.02   | 0.01   | 0.04   | 0.03         | 0.01 | 0.08 | 0.22 |      |
| CCK-81    | Colon                                       | Colon Adenocarcinoma                                         | 0.02     | 0.09    | 0.07              | 0.10   | 0.04   | 0.07   | 0.06   | 0.04         |         | 0.04    | 0.11               | 0.09    | 0.02   | 0.01   | 0.04   | 0.03   | 0.01         | 0.08 | 0.22 | 0.05    | 0.09    | 0.09    | 0.02   | 0.03   | 0.04   | 0.03         | 0.00 | 0.05 | 0.41 |      |
| LS-180    | Colon                                       | Colon Adenocarcinoma                                         | 0.12     | 0.09    | 0.07              | 0.08   | 0.06   | 0.06   | 0.05   | 0.05         |         | 0.05    | 0.09               | 0.09    | 0.02   | 0.03   | 0.04   | 0.03   | 0.00         | 0.05 | 0.41 | 0.05    | 0.09    | 0.09    | 0.02   | 0.03   | 0.04   | 0.03         | 0.01 | 0.04 | 0.30 |      |
| HCC-56    | Colon                                       | Colon Adenocarcinoma                                         | 0.01     | 0.09    | 0.07              | 0.09   | 0.06   | 0.06   | 0.03   | 0.05         |         | 0.06    | 0.09               | 0.07    | 0.02   | 0.03   | 0.04   | 0.03   | 0.01         | 0.04 | 0.30 | 0.07    | 0.10    | 0.11    | 0.02   | 0.27   | 0.05   | 0.04         | 0.01 | 0.25 | 0.24 |      |
| MDST8     | Colon                                       | Colorectal Carcinoma                                         | 0.05     | 0.09    | 0.07              | 0.09   | 0.05   | 0.06   | 0.04   | 0.04         |         | 0.04    | 0.09               | 0.09    | 0.01   | 0.03   | 0.04   | 0.02   | 0.01         | 0.02 | 0.14 | 0.06    | 0.11    | 0.09    | 0.01   | 0.03   | 0.04   | 0.02         | 0.01 | 0.02 | 0.14 |      |
| HT-115    | Colon                                       | Colorectal Carcinoma                                         | 0.46     | 0.09    | 0.06              | 0.09   | 0.06   | 0.04   | 0.04   | 0.04         |         | 0.06    | 0.11               | 0.09    | 0.02   | 0.03   | 0.04   | 0.03   | 0.01         | 0.02 | 0.18 | 0.06    | 0.11    | 0.09    | 0.02   | 0.03   | 0.04   | 0.03         | 0.01 | 0.02 | 0.18 |      |
| CL-40     | Colon                                       | Colorectal Carcinoma                                         | 0.69     | 0.12    | 0.09              | 0.11   | 0.07   | 0.09   | 0.05   | 0.06         |         | 0.06    | 0.11               | 0.09    | 0.02   | 0.03   | 0.04   | 0.03   | 0.01         | 0.02 | 0.18 | 0.06    | 0.11    | 0.09    | 0.02   | 0.03   | 0.04   | 0.03         | 0.01 | 0.02 | 0.18 |      |
| ISHIKAWA  | Endometrium                                 | Endometrial Adenocarcinoma                                   | 0.01     | 0.14    | 0.08              | 0.10   | 0.06   | 0.08   | 0.02   | 0.07         |         | 0.06    | 0.08               | 0.10    | 0.02   | 0.26   | 0.05   | 0.05   | 0.01         | 0.15 | 0.16 | 0.06    | 0.11    | 0.08    | 0.02   | 0.32   | 0.06   | 0.09         | 0.01 | 0.23 | 0.19 |      |
| AN3-CA    | Endometrium                                 | Endometrial Adenocarcinoma                                   | 0.02     | 0.14    | 0.07              | 0.11   | 0.08   | 0.08   | 0.02   | 0.07         |         | 0.52    | 0.56               | 0.46    | 0.50   | 0.58   | 0.60   | 0.58   | 0.57         | 0.49 | 0.58 | 0.04    | 0.08    | 0.06    | 0.01   | 0.25   | 0.05   | 0.03         | 0.01 | 0.24 | 0.23 |      |
| MFE-280   | Endometrium                                 | Endometrial Adenocarcinoma                                   | 0.07     | 0.11    | 0.09              | 0.15   | 0.09   | 0.10   | 0.05   | 0.10         |         | 0.10    | 0.13               | 0.19    | 0.04   | 0.31   | 0.06   | 0.04   | 0.01         | 0.29 | 0.32 | 0.06    | 0.11    | 0.08    | 0.02   | 0.30   | 0.05   | 0.03         | 0.01 | 0.29 | 0.32 |      |
| COLO-684  | Endometrium                                 | Endometrial Adenocarcinoma                                   | 0.01     | 0.09    | 0.07              | 0.10   | 0.06   | 0.06   | 0.04   | 0.06         |         | 0.51    | 0.60               | 0.47    | 0.50   | 0.58   | 0.62   | 0.61   | 0.60         | 0.49 | 0.57 | 0.01    | 0.09    | 0.07    | 0.02   | 0.30   | 0.05   | 0.03         | 0.01 | 0.30 | 0.20 |      |
| KLE       | Endometrium                                 | Endometrial Adenocarcinoma                                   | 0.01     | 0.09    | 0.07              | 0.09   | 0.07   | 0.07   | 0.02   | 0.06         |         | 0.06    | 0.10               | 0.11    | 0.04   | 0.30   | 0.05   | 0.03   | 0.02         | 0.27 | 0.25 | 0.06    | 0.10    | 0.11    | 0.04   | 0.30   | 0.05   | 0.03         | 0.01 | 0.26 | 0.25 |      |
| MFE-319   | Endometrium                                 | Endometrial Adenocarcinoma                                   | 0.01     | 0.10    | 0.07              | 0.11   | 0.06   | 0.08   | 0.04   | 0.08         |         | 0.06    | 0.13               | 0.12    | 0.03   | 0.33   | 0.06   | 0.05   | 0.01         | 0.30 | 0.20 | 0.06    | 0.13    | 0.12    | 0.03   | 0.33   | 0.06   | 0.05         | 0.01 | 0.30 | 0.20 |      |
| HEC-1     | Endometrium                                 | Endometrial Adenocarcinoma                                   | 0.02     | 0.10    | 0.08              | 0.11   | 0.07   | 0.08   | 0.04   | 0.05         |         | 0.05    | 0.10               | 0.10    | 0.02   | 0.30   | 0.05   | 0.03   | 0.01         | 0.26 | 0.25 | 0.02    | 0.10    | 0.10    | 0.02   | 0.30   | 0.05   | 0.03         | 0.01 | 0.26 | 0.25 |      |
| MFE-296   | Endometrium                                 | Endometrial Adenocarcinoma                                   | 0.03     | 0.11    | 0.08              | 0.10   | 0.07   | 0.07   | 0.04   | 0.08         |         | 0.06    | 0.11               | 0.08    | 0.02   | 0.32   | 0.06   | 0.09   | 0.01         | 0.23 | 0.19 | 0.06    | 0.11    | 0.08    | 0.02   | 0.32   | 0.06   | 0.09         | 0.01 | 0.23 | 0.19 |      |
| SNG-M     | Endometrium                                 | Endometrial Adenocarcinoma                                   | 0.01     | 0.13    | 0.08              | 0.12   | 0.09   | 0.10   | 0.05   | 0.07         |         | 0.06    | 0.11               | 0.10    | 0.02   | 0.17   | 0.05   | 0.05   | 0.01         | 0.14 | 0.22 | 0.01    | 0.13    | 0.08    | 0.12   | 0.09   | 0.10   | 0.05         | 0.07 | 0.04 | 0.08 |      |
| EN        | Endometrium                                 | Endometrial Carcinoma                                        | 0.03     | 0.09    | 0.11              | 0.13   | 0.10   | 0.10   | 0.03   | 0.11         |         | 0.07    | 0.12               | 0.16    | 0.03   | 0.30   | 0.05   | 0.04   | 0.02         | 0.36 | 0.36 | 0.03    | 0.09    | 0.11    | 0.13   | 0.10   | 0.10   | 0.03         | 0.03 | 0.01 | 0.02 | 0.18 |
| TOV-112D  | Endometrium                                 | Endometrial Carcinoma                                        | 0.11     | 0.12    | 0.08              | 0.10   | 0.07   | 0.10   | 0.05   | 0.07         |         | 0.87    | 0.50               | 0.37    | 0.21   | 0.46   | 0.61   | 0.25   | 0.25         | 0.40 | 0.35 | 0.03    | 0.09    | 0.11    | 0.13   | 0.10   | 0.11   | 0.03         | 0.01 | 0.02 | 0.18 |      |
| ESS-1     | Endometrium                                 | Endometrial Carcinosarcoma-Malignant Mesodermal Mixed Tumour | 0.10     | 0.11    | 0.08              | 0.11   | 0.07   | 0.07   | 0.02   | 0.05         |         | 0.57    | 0.60               | 0.40    | 0.24   | 0.42   | 0.24   | 0.13   | 0.11         | 0.37 | 0.50 | 0.04    | 0.08    | 0.06    | 0.01   | 0.25   | 0.05   | 0.03         | 0.01 | 0.24 | 0.23 |      |
| RL95-2    | Endometrium                                 | Endometrial Mixed Adenosquamous Carcinoma                    | 0.24     | 0.11    | 0.06              | 0.09   | 0.06   | 0.05   | 0.06   | 0.05         |         | 0.07    | 0.11               | 0.10    | 0.03   | 0.30   | 0.04   | 0.02   | 0.01         | 0.50 | 0.79 | 0.06    | 0.10    | 0.11    | 0.03   | 0.30   | 0.04   | 0.02         | 0.01 | 0.50 | 0.79 |      |
| KYSE-150  | Esophagus                                   | Oesophagus Squamous Cell Carcinoma                           | 0.07     | 0.07    | 0.09              | 0.08   | 0.08   | 0.08   | 0.04   | 0.09         |         | 0.06    | 0.08               | 0.09    | 0.02   | 0.22   | 0.06   | 0.07   | 0.00         | 0.35 | 0.42 | 0.01    | 0.13    | 0.10    | 0.10   | 0.08   | 0.08   | 0.03         | 0.01 | 0.08 | 0.03 |      |
| HCE-7     | Esophagus                                   | Oesophagus Squamous Cell Carcinoma                           | 0.01     | 0.13    | 0.10              | 0.10   | 0.08   | 0.08   | 0.03   | 0.08         |         | 0.05    | 0.09               | 0.09    | 0.02   | 0.03   | 0.04   | 0.02   | 0.01         | 0.05 | 0.22 | 0.01    | 0.08    | 0.07    | 0.09   | 0.02   | 0.34   | 0.07         | 0.05 | 0.00 | 0.17 | 0.16 |
| ECC4      | Gastrointestinal Tract (Site Indeterminate) | Gastrointestinal Tract Small Cell Carcinoma                  | 0.01     | 0.08    | 0.07              | 0.09   | 0.06   | 0.05   | 0.01   | 0.04         |         | 0.05    | 0.09               | 0.09    | 0.02   | 0.03   | 0.04   | 0.02   | 0.01         | 0.05 | 0.22 | 0.01    | 0.08    | 0.07    | 0.09   | 0.02   | 0.34   | 0.07         | 0.05 | 0.00 | 0.17 | 0.16 |
| RS4-11    | Haematopoietic And Lymphoid Tissue          | Acute Leukemia                                               | 0.14     | 0.12    | 0.07              | 0.10   | 0.06   | 0.07   | 0.04   | 0.06         |         | 0.05    | 0.14               | 0.10    | 0.02   | 0.26   | 0.06   | 0.08   | 0.05         | 0.42 | 0.36 | 0.06    | 0.14    | 0.10    | 0.02   | 0.26   | 0.06   | 0.08         | 0.05 | 0.42 | 0.36 |      |
| MV-4-11   | Haematopoietic And Lymphoid Tissue          | Acute Leukemia (Ambiguous Lineage)                           | 0.03     | 0.10    | 0.08              | 0.10   | 0.08   | 0.08   | 0.02   | 0.06         |         | 0.06    | 0.09               | 0.14    | 0.02   | 0.12   | 0.04   | 0.03   | 0.01         | 0.09 | 0.19 | 0.05    | 0.08    | 0.07    | 0.02   | 0.11   | 0.04   | 0.03         | 0.01 | 0.08 | 0.19 |      |
| KY821     | Haematopoietic And Lymphoid Tissue          | Acute Leukemia (Ambiguous Lineage)                           | 0.01     | 0.10    | 0.07              | 0.10   | 0.07   | 0.07   | 0.02   | 0.05         |         | 0.05    | 0.08               | 0.07    | 0.02   | 0.11   | 0.04   | 0.03   | 0            |      |      |         |         |         |        |        |        |              |      |      |      |      |

|            |                                    |                                      | TargetID | UCSC_REFGENE_NAME |         |        |        |        |        |        |              | UCSC_REFGENE_GROUP |         |         |         |        |        |        |        |              |      |      |         |         |         |        |        |        |        |              |      |      |      |      |      |      |      |      |      |      |      |      |      |
|------------|------------------------------------|--------------------------------------|----------|-------------------|---------|--------|--------|--------|--------|--------|--------------|--------------------|---------|---------|---------|--------|--------|--------|--------|--------------|------|------|---------|---------|---------|--------|--------|--------|--------|--------------|------|------|------|------|------|------|------|------|------|------|------|------|------|
|            |                                    |                                      |          | DCP2              |         |        |        |        |        |        |              | NUDT16             |         |         |         |        |        |        |        |              |      |      |         |         |         |        |        |        |        |              |      |      |      |      |      |      |      |      |      |      |      |      |      |
|            |                                    |                                      |          | TSS1500           | TSS1500 | TSS200 | TSS200 | TSS200 | TSS200 | TSS200 | 1stExon:5UTR | 1stExon            | TSS1500 | TSS1500 | TSS1500 | TSS200 | TSS200 | TSS200 | TSS200 | 5UTR:1stExon | Body | Body | TSS1500 | TSS1500 | TSS1500 | TSS200 | TSS200 | TSS200 | TSS200 | 5UTR:1stExon | Body | Body |      |      |      |      |      |      |      |      |      |      |      |
| Cell Line  | Tissue                             | Cell Line Type                       |          | 0.14              | 0.11    | 0.08   | 0.12   | 0.09   | 0.10   | 0.09   | 0.08         | 0.09               | 0.15    | 0.15    | 0.04    | 0.30   | 0.05   | 0.04   | 0.01   | 0.30         | 0.93 | 0.09 | 0.12    | 0.10    | 0.02    | 0.33   | 0.05   | 0.12   | 0.01   | 0.26         | 0.51 | 0.07 | 0.13 | 0.12 | 0.02 | 0.32 | 0.07 | 0.07 | 0.01 | 0.32 | 0.23 |      |      |
| CRO-AP2    | Haematopoietic And Lymphoid Tissue | B Cell Lymphoma                      |          | 0.47              | 0.21    | 0.12   | 0.13   | 0.07   | 0.08   | 0.03   | 0.08         | 0.07               | 0.12    | 0.10    | 0.02    | 0.33   | 0.05   | 0.12   | 0.01   | 0.26         | 0.51 | 0.07 | 0.12    | 0.10    | 0.02    | 0.33   | 0.05   | 0.12   | 0.01   | 0.26         | 0.51 | 0.07 | 0.13 | 0.12 | 0.02 | 0.32 | 0.07 | 0.07 | 0.01 | 0.32 | 0.23 |      |      |
| JEKO-1     | Haematopoietic And Lymphoid Tissue | B Cell Lymphoma                      |          | 0.56              | 0.14    | 0.12   | 0.16   | 0.08   | 0.07   | 0.07   | 0.06         | 0.54               | 0.83    | 0.52    | 0.13    | 0.87   | 0.92   | 0.97   | 0.98   | 0.59         | 0.31 | 0.54 | 0.83    | 0.52    | 0.13    | 0.87   | 0.92   | 0.97   | 0.98   | 0.59         | 0.31 | 0.54 | 0.83 | 0.52 | 0.13 | 0.87 | 0.92 | 0.97 | 0.98 | 0.59 | 0.31 |      |      |
| SCC-3      | Haematopoietic And Lymphoid Tissue | B Cell Lymphoma                      |          | 0.41              | 0.08    | 0.08   | 0.10   | 0.06   | 0.06   | 0.04   | 0.04         | 0.48               | 0.52    | 0.44    | 0.14    | 0.39   | 0.35   | 0.47   | 0.39   | 0.48         | 0.50 | 0.05 | 0.09    | 0.11    | 0.01    | 0.29   | 0.03   | 0.03   | 0.00   | 0.28         | 0.57 | 0.48 | 0.52 | 0.44 | 0.14 | 0.39 | 0.35 | 0.47 | 0.39 | 0.48 | 0.50 |      |      |
| RL         | Haematopoietic And Lymphoid Tissue | B Cell Lymphoma                      |          | 0.38              | 0.09    | 0.09   | 0.12   | 0.06   | 0.08   | 0.04   | 0.04         | 0.05               | 0.09    | 0.11    | 0.01    | 0.29   | 0.03   | 0.03   | 0.00   | 0.28         | 0.57 | 0.03 | 0.09    | 0.09    | 0.01    | 0.29   | 0.03   | 0.03   | 0.00   | 0.28         | 0.57 | 0.03 | 0.09 | 0.09 | 0.01 | 0.29 | 0.03 | 0.03 | 0.00 | 0.28 | 0.57 |      |      |
| SU-DHL-4   | Haematopoietic And Lymphoid Tissue | B Cell Lymphoma                      |          | 0.97              | 0.14    | 0.17   | 0.12   | 0.07   | 0.08   | 0.07   | 0.05         | 0.50               | 0.54    | 0.48    | 0.14    | 0.57   | 0.59   | 0.59   | 0.59   | 0.66         | 0.54 | 0.97 | 0.14    | 0.17    | 0.12    | 0.07   | 0.08   | 0.07   | 0.05   | 0.50         | 0.54 | 0.48 | 0.14 | 0.57 | 0.59 | 0.59 | 0.59 | 0.66 | 0.54 |      |      |      |      |
| SU-DHL-16  | Haematopoietic And Lymphoid Tissue | B Cell Lymphoma                      |          | 0.03              | 0.08    | 0.09   | 0.10   | 0.08   | 0.09   | 0.03   | 0.07         | 0.56               | 0.58    | 0.50    | 0.43    | 0.60   | 0.58   | 0.61   | 0.59   | 0.51         | 0.60 | 0.03 | 0.08    | 0.09    | 0.10    | 0.08   | 0.09   | 0.03   | 0.07   | 0.56         | 0.58 | 0.50 | 0.43 | 0.60 | 0.58 | 0.61 | 0.59 | 0.51 | 0.60 |      |      |      |      |
| SU-DHL-8   | Haematopoietic And Lymphoid Tissue | B Cell Lymphoma                      |          | 0.03              | 0.07    | 0.09   | 0.11   | 0.07   | 0.08   | 0.03   | 0.07         | 0.87               | 0.83    | 0.48    | 0.03    | 0.47   | 0.58   | 0.91   | 0.99   | 0.50         | 0.25 | 0.03 | 0.07    | 0.09    | 0.11    | 0.07   | 0.08   | 0.03   | 0.07   | 0.87         | 0.83 | 0.48 | 0.03 | 0.47 | 0.58 | 0.91 | 0.99 | 0.50 | 0.25 |      |      |      |      |
| RC-K8      | Haematopoietic And Lymphoid Tissue | B Cell Lymphoma                      |          | 0.04              | 0.08    | 0.08   | 0.11   | 0.06   | 0.06   | 0.04   | 0.06         | 0.05               | 0.07    | 0.11    | 0.01    | 0.32   | 0.03   | 0.04   | 0.00   | 0.30         | 0.45 | 0.05 | 0.07    | 0.11    | 0.01    | 0.32   | 0.03   | 0.04   | 0.00   | 0.30         | 0.45 | 0.05 | 0.07 | 0.11 | 0.01 | 0.32 | 0.03 | 0.04 | 0.00 | 0.30 | 0.45 |      |      |
| SU-DHL-10  | Haematopoietic And Lymphoid Tissue | B Cell Lymphoma                      |          | 0.10              | 0.12    | 0.08   | 0.10   | 0.06   | 0.09   | 0.04   | 0.06         | 0.06               | 0.12    | 0.10    | 0.02    | 0.21   | 0.05   | 0.06   | 0.00   | 0.52         | 0.58 | 0.06 | 0.09    | 0.07    | 0.02    | 0.31   | 0.03   | 0.03   | 0.01   | 0.31         | 0.24 | 0.06 | 0.11 | 0.07 | 0.01 | 0.26 | 0.03 | 0.03 | 0.00 | 0.21 | 0.34 |      |      |
| JSC-1      | Haematopoietic And Lymphoid Tissue | B Cell Lymphoma                      |          | 0.01              | 0.10    | 0.07   | 0.09   | 0.06   | 0.08   | 0.03   | 0.05         | 0.06               | 0.09    | 0.07    | 0.01    | 0.30   | 0.06   | 0.09   | 0.01   | 0.25         | 0.19 | 0.06 | 0.09    | 0.09    | 0.01    | 0.30   | 0.03   | 0.03   | 0.01   | 0.25         | 0.19 | 0.06 | 0.09 | 0.09 | 0.01 | 0.30 | 0.03 | 0.03 | 0.01 | 0.25 | 0.19 |      |      |
| NU-DUL-1   | Haematopoietic And Lymphoid Tissue | B Cell Lymphoma                      |          | 0.55              | 0.13    | 0.09   | 0.09   | 0.07   | 0.07   | 0.02   | 0.06         | 0.86               | 0.76    | 0.53    | 0.30    | 0.64   | 0.73   | 0.70   | 0.97   | 0.98         | 0.68 | 0.01 | 0.09    | 0.05    | 0.07    | 0.05   | 0.05   | 0.03   | 0.00   | 0.97         | 0.98 | 0.68 | 0.73 | 0.70 | 0.97 | 0.98 | 0.68 | 0.73 | 0.70 | 0.97 | 0.98 | 0.68 |      |
| TK         | Haematopoietic And Lymphoid Tissue | B Cell Lymphoma                      |          | 0.91              | 0.09    | 0.05   | 0.07   | 0.05   | 0.05   | 0.03   | 0.06         | 0.87               | 0.19    | 0.13    | 0.02    | 0.26   | 0.07   | 0.38   | 0.82   | 0.33         | 0.20 | 0.06 | 0.09    | 0.05    | 0.02    | 0.26   | 0.07   | 0.38   | 0.82   | 0.33         | 0.20 | 0.06 | 0.09 | 0.05 | 0.02 | 0.26 | 0.07 | 0.38 | 0.82 | 0.33 | 0.20 |      |      |
| GRANTA-519 | Haematopoietic And Lymphoid Tissue | B Cell Lymphoma                      |          | 0.51              | 0.56    | 0.26   | 0.03   | 0.33   | 0.25   | 0.31   | 0.82         | 0.44               | 0.56    | 0.26    | 0.03    | 0.33   | 0.25   | 0.31   | 0.82   | 0.44         | 0.56 | 0.26 | 0.03    | 0.33    | 0.25    | 0.31   | 0.82   | 0.44   | 0.56   | 0.26         | 0.03 | 0.33 | 0.25 | 0.31 | 0.82 | 0.44 | 0.56 | 0.26 | 0.03 | 0.33 | 0.25 |      |      |
| VAL        | Haematopoietic And Lymphoid Tissue | B Cell Lymphoma                      |          | 0.06              | 0.09    | 0.07   | 0.08   | 0.06   | 0.07   | 0.06   | 0.04         | 0.25               | 0.34    | 0.18    | 0.04    | 0.28   | 0.15   | 0.15   | 0.12   | 0.39         | 0.34 | 0.07 | 0.14    | 0.08    | 0.01    | 0.28   | 0.15   | 0.15   | 0.12   | 0.39         | 0.34 | 0.07 | 0.14 | 0.08 | 0.01 | 0.28 | 0.15 | 0.15 | 0.12 | 0.39 | 0.34 |      |      |
| WSU-DLCL2  | Haematopoietic And Lymphoid Tissue | B Cell Lymphoma                      |          | 0.07              | 0.14    | 0.08   | 0.11   | 0.08   | 0.07   | 0.04   | 0.07         | 0.07               | 0.12    | 0.10    | 0.03    | 0.35   | 0.05   | 0.07   | 0.01   | 0.54         | 0.85 | 0.06 | 0.09    | 0.10    | 0.03    | 0.35   | 0.05   | 0.07   | 0.01   | 0.54         | 0.85 | 0.06 | 0.09 | 0.10 | 0.03 | 0.35 | 0.05 | 0.07 | 0.01 | 0.54 | 0.85 |      |      |
| BC-1       | Haematopoietic And Lymphoid Tissue | B Cell Lymphoma                      |          | 0.52              | 0.17    | 0.10   | 0.14   | 0.08   | 0.08   | 0.05   | 0.08         | 0.05               | 0.09    | 0.12    | 0.04    | 0.06   | 0.07   | 0.04   | 0.01   | 0.05         | 0.17 | 0.05 | 0.09    | 0.12    | 0.04    | 0.06   | 0.07   | 0.04   | 0.01   | 0.05         | 0.17 | 0.05 | 0.09 | 0.12 | 0.04 | 0.06 | 0.07 | 0.04 | 0.01 | 0.05 | 0.17 |      |      |
| SU-DHL-6   | Haematopoietic And Lymphoid Tissue | B Cell Lymphoma                      |          | 0.99              | 0.14    | 0.09   | 0.12   | 0.07   | 0.08   | 0.04   | 0.08         | 0.20               | 0.14    | 0.20    | 0.03    | 0.35   | 0.07   | 0.12   | 0.03   | 0.51         | 0.61 | 0.09 | 0.14    | 0.09    | 0.12    | 0.07   | 0.08   | 0.04   | 0.08   | 0.20         | 0.14 | 0.20 | 0.03 | 0.35 | 0.07 | 0.12 | 0.03 | 0.51 | 0.61 |      |      |      |      |
| SU-DHL-5   | Haematopoietic And Lymphoid Tissue | B Cell Lymphoma                      |          | 0.99              | 0.23    | 0.11   | 0.11   | 0.07   | 0.08   | 0.04   | 0.08         | 0.40               | 0.47    | 0.37    | 0.14    | 0.54   | 0.61   | 0.48   | 0.58   | 0.60         | 0.63 | 0.01 | 0.09    | 0.11    | 0.01    | 0.32   | 0.03   | 0.03   | 0.00   | 0.52         | 0.58 | 0.60 | 0.47 | 0.37 | 0.14 | 0.54 | 0.61 | 0.48 | 0.58 | 0.60 | 0.63 |      |      |
| HT         | Haematopoietic And Lymphoid Tissue | B Cell Lymphoma                      |          | 0.01              | 0.11    | 0.09   | 0.11   | 0.08   | 0.09   | 0.03   | 0.07         | 0.06               | 0.12    | 0.10    | 0.02    | 0.21   | 0.05   | 0.06   | 0.00   | 0.52         | 0.58 | 0.06 | 0.09    | 0.07    | 0.02    | 0.31   | 0.03   | 0.03   | 0.00   | 0.21         | 0.34 | 0.06 | 0.11 | 0.07 | 0.01 | 0.26 | 0.03 | 0.03 | 0.00 | 0.21 | 0.34 |      |      |
| JM1        | Haematopoietic And Lymphoid Tissue | B Cell Lymphoma                      |          | 0.01              | 0.08    | 0.09   | 0.09   | 0.05   | 0.06   | 0.03   | 0.05         | 0.06               | 0.10    | 0.10    | 0.02    | 0.30   | 0.06   | 0.05   | 0.03   | 0.30         | 0.26 | 0.01 | 0.08    | 0.09    | 0.01    | 0.30   | 0.06   | 0.05   | 0.03   | 0.30         | 0.26 | 0.01 | 0.08 | 0.09 | 0.01 | 0.30 | 0.06 | 0.05 | 0.03 | 0.30 | 0.26 |      |      |
| KOPN-8     | Haematopoietic And Lymphoid Tissue | B Cell Precursor Leukemia            |          | 0.12              | 0.13    | 0.09   | 0.11   | 0.07   | 0.07   | 0.04   | 0.04         | 0.07               | 0.11    | 0.11    | 0.03    | 0.34   | 0.05   | 0.03   | 0.01   | 0.51         | 0.73 | 0.01 | 0.08    | 0.07    | 0.10    | 0.02   | 0.34   | 0.05   | 0.03   | 0.01         | 0.51 | 0.73 | 0.01 | 0.08 | 0.07 | 0.10 | 0.02 | 0.34 | 0.05 | 0.03 | 0.01 | 0.51 | 0.73 |
| WIL2-NS    | Haematopoietic And Lymphoid Tissue | B Lymphocyte                         |          | 0.01              | 0.08    | 0.07   | 0.10   | 0.08   | 0.09   | 0.06   | 0.08         | 0.07               | 0.12    | 0.12    | 0.03    | 0.31   | 0.08   | 0.09   | 0.01   | 0.35         | 0.31 | 0.01 | 0.09    | 0.07    | 0.01    | 0.31   | 0.08   | 0.09   | 0.01   | 0.35         | 0.31 | 0.01 | 0.09 | 0.07 | 0.01 | 0.31 | 0.08 | 0.09 | 0.01 | 0.35 | 0.31 |      |      |
| EM-2       | Haematopoietic And Lymphoid Tissue | Blast Phase Chronic Myeloid Leukemia |          | 0.01              | 0.09    | 0.07   | 0.10   | 0.06   | 0.06   | 0.02   | 0.05         | 0.04               | 0.10    | 0.07    | 0.01    | 0.26   | 0.04   | 0.03   | 0.01   | 0.31         | 0.24 | 0.01 | 0.09    | 0.07    | 0.01    | 0.26   | 0.04   | 0.03   | 0.01   | 0.31         | 0.24 | 0.01 | 0.09 | 0.07 | 0.01 | 0.26 | 0.04 | 0.03 | 0.01 | 0.31 | 0.24 |      |      |
| MEG-01     | Haematopoietic And Lymphoid Tissue | Blast Phase Chronic Myeloid Leukemia |          | 0.00              | 0.10    |        |        |        |        |        |              |                    |         |         |         |        |        |        |        |              |      |      |         |         |         |        |        |        |        |              |      |      |      |      |      |      |      |      |      |      |      |      |      |

|            |                 |                            | TargetID | UCSC_REFGENE_NAME |         |        |        |        |        |              |         | UCSC_REFGENE_GROUP |         |         |        |        |        |        |              |      |      |         |         |         |        |        |        |              |      |      |      |
|------------|-----------------|----------------------------|----------|-------------------|---------|--------|--------|--------|--------|--------------|---------|--------------------|---------|---------|--------|--------|--------|--------|--------------|------|------|---------|---------|---------|--------|--------|--------|--------------|------|------|------|
|            |                 |                            |          | DCP2              |         |        |        |        |        |              |         | NUDT16             |         |         |        |        |        |        |              |      |      |         |         |         |        |        |        |              |      |      |      |
|            |                 |                            |          | TSS1500           | TSS1500 | TSS200 | TSS200 | TSS200 | TSS200 | 1stExon;5UTR | 1stExon | TSS1500            | TSS1500 | TSS1500 | TSS200 | TSS200 | TSS200 | TSS200 | 5UTR;1stExon | Body | Body | TSS1500 | TSS1500 | TSS1500 | TSS200 | TSS200 | TSS200 | 5UTR;1stExon | Body | Body |      |
| Cell Line  | Tissue          | Cell Line Type             |          |                   |         |        |        |        |        |              |         |                    |         |         |        |        |        |        |              |      |      |         |         |         |        |        |        |              |      |      |      |
| NCC021     | Kidney          | Ns                         |          | 0.31              | 0.14    | 0.08   | 0.10   | 0.08   | 0.09   | 0.02         | 0.08    | 0.05               | 0.09    | 0.08    | 0.02   | 0.09   | 0.04   | 0.04   | 0.01         | 0.20 | 0.21 | 0.05    | 0.10    | 0.08    | 0.02   | 0.21   | 0.05   | 0.04         | 0.01 | 0.09 | 0.20 |
| NCC010     | Kidney          | Ns                         |          | 0.36              | 0.23    | 0.09   | 0.11   | 0.07   | 0.08   | 0.04         | 0.07    | 0.05               | 0.10    | 0.08    | 0.02   | 0.03   | 0.02   | 0.01   | 0.01         | 0.01 | 0.16 | 0.00    | 0.09    | 0.08    | 0.10   | 0.07   | 0.02   | 0.03         | 0.02 | 0.01 | 0.01 |
| KMRC-20    | Kidney          | Ns                         |          | 0.00              | 0.09    | 0.08   | 0.10   | 0.07   | 0.09   | 0.03         | 0.05    | 0.05               | 0.10    | 0.07    | 0.02   | 0.03   | 0.02   | 0.01   | 0.01         | 0.01 | 0.16 | 0.05    | 0.07    | 0.07    | 0.01   | 0.03   | 0.02   | 0.02         | 0.00 | 0.03 | 0.12 |
| A498       | Kidney          | Renal Cell Carcinoma       |          | 0.04              | 0.08    | 0.06   | 0.09   | 0.06   | 0.06   | 0.01         | 0.05    | 0.02               | 0.04    | 0.05    | 0.00   | 0.01   | 0.01   | 0.00   | 0.00         | 0.01 | 0.05 | 0.03    | 0.03    | 0.03    | 0.07   | 0.03   | 0.03   | 0.03         | 0.01 | 0.02 | 0.15 |
| ACHN       | Kidney          | Renal Cell Carcinoma       |          | 0.03              | 0.03    | 0.03   | 0.07   | 0.03   | 0.05   | 0.03         | 0.05    | 0.02               | 0.04    | 0.05    | 0.00   | 0.01   | 0.01   | 0.00   | 0.00         | 0.01 | 0.05 | 0.05    | 0.11    | 0.09    | 0.03   | 0.03   | 0.03   | 0.03         | 0.01 | 0.02 | 0.15 |
| RCC10RGB   | Kidney          | Renal Cell Carcinoma       |          | 0.02              | 0.09    | 0.07   | 0.10   | 0.06   | 0.08   | 0.03         | 0.06    | 0.05               | 0.10    | 0.08    | 0.01   | 0.02   | 0.03   | 0.02   | 0.01         | 0.01 | 0.02 | 0.12    | 0.05    | 0.10    | 0.08   | 0.01   | 0.02   | 0.03         | 0.02 | 0.01 | 0.02 |
| TK10       | Kidney          | Renal Cell Carcinoma       |          | 0.05              | 0.11    | 0.08   | 0.10   | 0.07   | 0.06   | 0.04         | 0.05    | 0.06               | 0.15    | 0.10    | 0.02   | 0.05   | 0.05   | 0.03   | 0.01         | 0.04 | 0.16 | 0.06    | 0.10    | 0.10    | 0.03   | 0.06   | 0.05   | 0.04         | 0.01 | 0.02 | 0.17 |
| OS-RC-2    | Kidney          | Renal Cell Carcinoma       |          | 0.06              | 0.10    | 0.08   | 0.10   | 0.06   | 0.06   | 0.04         | 0.04    | 0.06               | 0.07    | 0.08    | 0.02   | 0.05   | 0.01   | 0.01   | 0.00         | 0.07 | 0.13 | 0.00    | 0.15    | 0.08    | 0.10   | 0.08   | 0.09   | 0.04         | 0.01 | 0.03 | 0.55 |
| VMRC-RCZ   | Kidney          | Renal Cell Carcinoma       |          | 0.00              | 0.15    | 0.08   | 0.10   | 0.08   | 0.09   | 0.04         | 0.08    | 0.07               | 0.15    | 0.10    | 0.02   | 0.05   | 0.06   | 0.03   | 0.01         | 0.03 | 0.15 | 0.02    | 0.14    | 0.09    | 0.11   | 0.07   | 0.09   | 0.06         | 0.08 |      |      |
| BB65-RCC   | Kidney          | Renal Cell Carcinoma       |          | 0.27              | 0.14    | 0.09   | 0.11   | 0.07   | 0.09   | 0.06         | 0.08    | 0.07               | 0.15    | 0.10    | 0.02   | 0.05   | 0.06   | 0.03   | 0.01         | 0.03 | 0.15 | 0.00    | 0.10    | 0.09    | 0.09   | 0.07   | 0.07   | 0.04         | 0.01 | 0.16 | 0.19 |
| HA7-RCC    | Kidney          | Renal Cell Carcinoma       |          | 0.00              | 0.10    | 0.09   | 0.09   | 0.07   | 0.07   | 0.04         | 0.05    | 0.05               | 0.08    | 0.08    | 0.02   | 0.21   | 0.04   | 0.02   | 0.01         | 0.16 | 0.19 | 0.04    | 0.10    | 0.08    | 0.02   | 0.08   | 0.04   | 0.03         | 0.01 | 0.09 | 0.19 |
| LB1047-RCC | Kidney          | Renal Cell Carcinoma       |          | 0.00              | 0.09    | 0.08   | 0.09   | 0.06   | 0.06   | 0.04         | 0.06    | 0.06               | 0.10    | 0.08    | 0.01   | 0.03   | 0.05   | 0.02   | 0.01         | 0.02 | 0.15 | 0.03    | 0.09    | 0.08    | 0.10   | 0.06   | 0.07   | 0.04         | 0.05 |      |      |
| LB2241-RCC | Kidney          | Renal Cell Carcinoma       |          | 0.03              | 0.09    | 0.08   | 0.10   | 0.06   | 0.07   | 0.04         | 0.05    | 0.06               | 0.10    | 0.08    | 0.01   | 0.03   | 0.05   | 0.02   | 0.02         | 0.01 | 0.05 | 0.04    | 0.09    | 0.08    | 0.02   | 0.15   | 0.05   | 0.12         | 0.01 | 0.26 | 0.29 |
| A704       | Kidney          | Renal Cell Carcinoma       |          | 0.03              | 0.11    | 0.08   | 0.11   | 0.06   | 0.08   | 0.03         | 0.05    | 0.04               | 0.09    | 0.08    | 0.02   | 0.15   | 0.05   | 0.12   | 0.01         | 0.26 | 0.29 | 0.03    | 0.08    | 0.06    | 0.10   | 0.06   | 0.07   | 0.05         | 0.04 |      |      |
| CAL-54     | Kidney          | Renal Cell Carcinoma       |          | 0.03              | 0.08    | 0.06   | 0.10   | 0.06   | 0.07   | 0.05         | 0.04    | 0.05               | 0.09    | 0.09    | 0.01   | 0.02   | 0.04   | 0.02   | 0.01         | 0.07 | 0.16 | 0.03    | 0.10    | 0.06    | 0.09   | 0.01   | 0.02   | 0.04         | 0.02 | 0.15 |      |
| LB996-RCC  | Kidney          | Renal Cell Carcinoma       |          | 0.03              | 0.10    | 0.06   | 0.09   | 0.05   | 0.07   | 0.02         | 0.05    | 0.04               | 0.08    | 0.07    | 0.02   | 0.03   | 0.06   | 0.03   | 0.01         | 0.02 | 0.15 | 0.03    | 0.10    | 0.11    | 0.01   | 0.07   | 0.04   | 0.01         | 0.03 | 0.16 |      |
| SN12C      | Kidney          | Renal Cell Carcinoma       |          | 0.09              | 0.13    | 0.14   | 0.13   | 0.09   | 0.10   | 0.03         | 0.09    | 0.06               | 0.10    | 0.11    | 0.01   | 0.07   | 0.04   | 0.04   | 0.01         | 0.03 | 0.16 | 0.01    | 0.13    | 0.09    | 0.12   | 0.07   | 0.10   | 0.04         | 0.08 |      |      |
| RXF393     | Kidney          | Renal Cell Carcinoma       |          | 0.01              | 0.13    | 0.09   | 0.12   | 0.07   | 0.10   | 0.04         | 0.08    | 0.06               | 0.15    | 0.10    | 0.02   | 0.05   | 0.05   | 0.03   | 0.01         | 0.04 | 0.16 | 0.06    | 0.10    | 0.10    | 0.02   | 0.05   | 0.05   | 0.03         | 0.01 | 0.04 | 0.16 |
| UO31       | Kidney          | Renal Cell Carcinoma       |          | 0.01              | 0.14    | 0.08   | 0.11   | 0.08   | 0.09   | 0.03         | 0.08    | 0.06               | 0.10    | 0.10    | 0.03   | 0.06   | 0.05   | 0.04   | 0.01         | 0.02 | 0.17 | 0.00    | 0.08    | 0.07    | 0.10   | 0.06   | 0.05   | 0.02         | 0.06 |      |      |
| 786-0      | Kidney          | Renal Clear Cell Carcinoma |          | 0.00              | 0.08    | 0.07   | 0.10   | 0.06   | 0.05   | 0.02         | 0.06    | 0.04               | 0.06    | 0.08    | 0.02   | 0.08   | 0.02   | 0.00   | 0.00         | 0.25 | 0.60 | 0.02    | 0.11    | 0.06    | 0.09   | 0.05   | 0.06   | 0.02         | 0.04 | 0.05 | 0.18 |
| 769-P      | Kidney          | Renal Clear Cell Carcinoma |          | 0.02              | 0.11    | 0.06   | 0.09   | 0.05   | 0.06   | 0.02         | 0.04    | 0.04               | 0.08    | 0.08    | 0.02   | 0.04   | 0.02   | 0.02   | 0.01         | 0.05 | 0.18 | 0.03    | 0.11    | 0.09    | 0.12   | 0.09   | 0.10   | 0.03         | 0.09 |      |      |
| CAKI-1     | Kidney          | Renal Clear Cell Carcinoma |          | 0.03              | 0.11    | 0.09   | 0.12   | 0.09   | 0.10   | 0.03         | 0.09    | 0.06               | 0.13    | 0.13    | 0.02   | 0.21   | 0.04   | 0.05   | 0.01         | 0.18 | 0.18 | 0.05    | 0.08    | 0.07    | 0.02   | 0.26   | 0.04   | 0.03         | 0.00 | 0.27 | 0.45 |
| G-401      | Kidney          | Rhabdoid Tumour            |          | 0.01              | 0.09    | 0.08   | 0.10   | 0.06   | 0.06   | 0.02         | 0.05    | 0.05               | 0.08    | 0.07    | 0.02   | 0.26   | 0.04   | 0.03   | 0.00         | 0.27 | 0.45 | 0.08    | 0.11    | 0.08    | 0.10   | 0.06   | 0.07   | 0.04         | 0.05 |      |      |
| SK-NEP-1   | Kidney          | Wilms Tumour               |          | 0.08              | 0.11    | 0.08   | 0.10   | 0.06   | 0.07   | 0.04         | 0.05    | 0.72               | 0.60    | 0.55    | 0.26   | 0.72   | 0.84   | 0.72   | 0.80         | 0.78 | 0.94 | 0.03    | 0.13    | 0.09    | 0.09   | 0.07   | 0.09   | 0.04         | 0.07 |      |      |
| SNU-C5     | Large Intestine | Adenocarcinoma             |          | 0.30              | 0.13    | 0.09   | 0.09   | 0.07   | 0.09   | 0.04         | 0.07    | 0.07               | 0.10    | 0.08    | 0.03   | 0.02   | 0.04   | 0.03   | 0.01         | 0.01 | 0.14 | 0.05    | 0.09    | 0.08    | 0.09   | 0.06   | 0.06   | 0.04         | 0.05 |      |      |
| LS-513     | Large Intestine | Caecum Adenocarcinoma      |          | 0.05              | 0.09    | 0.06   | 0.09   | 0.06   | 0.06   | 0.04         | 0.05    | 0.04               | 0.09    | 0.08    | 0.02   | 0.03   | 0.03   | 0.04   | 0.01         | 0.02 | 0.14 | 0.05    | 0.10    | 0.08    | 0.10   | 0.06   | 0.06   | 0.02         | 0.05 |      |      |
| NCI-H747   | Large Intestine | Caecum Adenocarcinoma      |          | 0.05              | 0.10    | 0.08   | 0.10   | 0.06   | 0.06   | 0.02         | 0.05    | 0.05               | 0.08    | 0.08    | 0.02   | 0.05   | 0.03   | 0.03   | 0.01         | 0.04 | 0.27 | 0.01    | 0.10    | 0.06    | 0.10   | 0.07   | 0.06   | 0.06         | 0.05 |      |      |
| SNU-C2B    | Large Intestine | Caecum Adenocarcinoma      |          | 0.01              | 0.10    | 0.06   | 0.10   | 0.07   | 0.06   | 0.06         | 0.05    | 0.05               | 0.08    | 0.10    | 0.02   | 0.11   | 0.04   | 0.03   | 0.01         | 0.30 | 0.22 | 0.00    | 0.05    | 0.07    | 0.09   | 0.05   | 0.07   | 0.03         | 0.05 |      |      |
| NCI-H508   | Large Intestine | Caecum Adenocarcinoma      |          | 0.00              | 0.05    | 0.07   | 0.09   | 0.05   | 0.07   | 0.03         | 0.05    | 0.04               | 0.08    | 0.08    | 0.02   | 0.01   | 0.03   | 0.01   | 0.00         | 0.01 | 0.14 | 0.01    | 0.13    | 0.09    | 0.10   | 0.07   | 0.08   | 0.07         | 0.04 | 0.08 |      |
| SNU-283    | Large Intestine | Carcinoma                  |          | 0.01              | 0.13    | 0.08   | 0.10   | 0.07   | 0.08   | 0.07         | 0.06    | 0.07               | 0.11    | 0.09    | 0.03   | 0.04   | 0.03   | 0.03   | 0.01         | 0.02 | 0.17 | 0.03    | 0.14    | 0.09    | 0.10   | 0.07   | 0.08   | 0.02         | 0.07 |      |      |
| SNU-1040   | Large Intestine | Carcinoma                  |          | 0.03              | 0.14    | 0.09   | 0.10   | 0.07   | 0.08   | 0.02         | 0.07    | 0.05               | 0.10    | 0.09    | 0.03   | 0.02   | 0.03   | 0.02   | 0.01         | 0.01 | 0.11 | 0.03    | 0.13    | 0.09    | 0.10   | 0.08   | 0.08   | 0.04         | 0.09 |      |      |
| SNU-175    | Large Intestine | Carcinoma                  |          | 0.03              | 0.13    | 0.09   | 0.10   | 0.08   | 0.08   | 0.04         | 0.09    | 0.07               | 0.13    | 0.09    | 0.02   | 0.     |        |        |              |      |      |         |         |         |        |        |        |              |      |      |      |

|            |        |                                        | TargetID   | UCSC_REFGENE_NAME |         |        |        |        |        |        |              | UCSC_REFGENE_GROUP |         |         |         |        |        |        |        |              |      |             |         |         |         |        |        |        |        |              |      |      |  |  |  |
|------------|--------|----------------------------------------|------------|-------------------|---------|--------|--------|--------|--------|--------|--------------|--------------------|---------|---------|---------|--------|--------|--------|--------|--------------|------|-------------|---------|---------|---------|--------|--------|--------|--------|--------------|------|------|--|--|--|
|            |        |                                        |            | DCP2              |         |        |        |        |        |        |              | NUDT16             |         |         |         |        |        |        |        |              |      |             |         |         |         |        |        |        |        |              |      |      |  |  |  |
|            |        |                                        |            | TSS1500           | TSS1500 | TSS200 | TSS200 | TSS200 | TSS200 | TSS200 | 1stExon;5UTR | 1stExon            | TSS1500 | TSS1500 | TSS1500 | TSS200 | TSS200 | TSS200 | TSS200 | 5UTR;1stExon | Body | Body        | TSS1500 | TSS1500 | TSS1500 | TSS200 | TSS200 | TSS200 | TSS200 | 5UTR;1stExon | Body | Body |  |  |  |
| Cell Line  | Tissue | Cell Line Type                         | cg21539223 | 0.01              | 0.08    | 0.09   | 0.11   | 0.08   | 0.06   | 0.02   | 0.06         | 0.05               | 0.11    | 0.07    | 0.02    | 0.09   | 0.05   | 0.03   | 0.01   | 0.16         | 0.18 | cg13518195  | 0.05    | 0.11    | 0.07    | 0.02   | 0.09   | 0.05   | 0.03   | 0.01         | 0.16 | 0.18 |  |  |  |
| NCI-H1666  | Lung   | Lung Bronchioloalveolar Adenocarcinoma | cg16486337 | 0.00              | 0.09    | 0.09   | 0.10   | 0.07   | 0.07   | 0.03   | 0.07         | 0.05               | 0.09    | 0.08    | 0.01    | 0.03   | 0.03   | 0.02   | 0.01   | 0.00         | 0.13 | cg284649500 | 0.07    | 0.11    | 0.08    | 0.04   | 0.27   | 0.04   | 0.04   | 0.01         | 0.25 | 0.25 |  |  |  |
| NCI-H358   | Lung   | Lung Bronchioloalveolar Adenocarcinoma | cg15956794 | 0.02              | 0.10    | 0.08   | 0.11   | 0.07   | 0.08   | 0.04   | 0.06         | 0.07               | 0.11    | 0.08    | 0.04    | 0.02   | 0.04   | 0.04   | 0.01   | 0.01         | 0.13 | cg01092811  | 0.06    | 0.10    | 0.09    | 0.01   | 0.02   | 0.01   | 0.02   | 0.00         | 0.00 | 0.17 |  |  |  |
| NCI-H322M  | Lung   | Lung Bronchioloalveolar Adenocarcinoma | cg14773728 | 0.01              | 0.07    | 0.06   | 0.10   | 0.06   | 0.06   | 0.02   | 0.06         | 0.06               | 0.10    | 0.09    | 0.01    | 0.02   | 0.01   | 0.02   | 0.00   | 0.00         | 0.17 | cg06383041  | 0.07    | 0.08    | 0.09    | 0.02   | 0.26   | 0.02   | 0.02   | 0.01         | 0.13 | 0.30 |  |  |  |
| UMC-11     | Lung   | Lung Carcinoid-Endocrine Tumour        | cg17573603 | 0.08              | 0.09    | 0.09   | 0.10   | 0.06   | 0.08   | 0.05   | 0.06         | 0.15               | 0.13    | 0.09    | 0.03    | 0.32   | 0.05   | 0.07   | 0.02   | 0.27         | 0.31 | cg25437259  | 0.06    | 0.08    | 0.09    | 0.02   | 0.32   | 0.05   | 0.07   | 0.02         | 0.27 | 0.31 |  |  |  |
| NCI-H835   | Lung   | Lung Carcinoid-Endocrine Tumour        | cg17919331 | 0.01              | 0.09    | 0.08   | 0.09   | 0.07   | 0.06   | 0.02   | 0.06         | 0.04               | 0.09    | 0.07    | 0.03    | 0.29   | 0.03   | 0.02   | 0.01   | 0.29         | 0.27 | cg14506646  | 0.03    | 0.11    | 0.08    | 0.03   | 0.03   | 0.02   | 0.02   | 0.01         | 0.06 | 0.12 |  |  |  |
| LB647-SCLC | Lung   | Lung Carcinoma                         | cg23965551 | 0.02              | 0.10    | 0.08   | 0.08   | 0.07   | 0.07   | 0.02   | 0.06         | 0.05               | 0.09    | 0.07    | 0.02    | 0.02   | 0.04   | 0.01   | 0.01   | 0.01         | 0.12 | cg14861803  | 0.03    | 0.11    | 0.12    | 0.02   | 0.34   | 0.05   | 0.07   | 0.01         | 0.37 | 0.41 |  |  |  |
| CHAGO-K-1  | Lung   | Lung Carcinoma                         | cg00522836 | 0.02              | 0.10    | 0.08   | 0.08   | 0.07   | 0.07   | 0.02   | 0.06         | 0.06               | 0.07    | 0.08    | 0.01    | 0.23   | 0.03   | 0.02   | 0.00   | 0.28         | 0.66 | cg25437259  | 0.07    | 0.11    | 0.08    | 0.04   | 0.25   | 0.05   | 0.09   | 0.01         | 0.19 | 0.26 |  |  |  |
| NCI-H727   | Lung   | Lung Carcinoma                         |            | 0.01              | 0.14    | 0.07   | 0.10   | 0.09   | 0.08   | 0.05   | 0.09         | 0.06               | 0.07    | 0.08    | 0.01    | 0.23   | 0.03   | 0.02   | 0.00   | 0.28         | 0.66 | cg14506646  | 0.06    | 0.13    | 0.08    | 0.04   | 0.25   | 0.05   | 0.09   | 0.01         | 0.19 | 0.26 |  |  |  |
| BEN        | Lung   | Lung Carcinoma                         |            | 0.34              | 0.22    | 0.13   | 0.13   | 0.07   | 0.06   | 0.03   | 0.05         | 0.06               | 0.07    | 0.08    | 0.01    | 0.23   | 0.03   | 0.02   | 0.00   | 0.28         | 0.66 | cg14506646  | 0.06    | 0.13    | 0.08    | 0.04   | 0.25   | 0.05   | 0.09   | 0.01         | 0.19 | 0.26 |  |  |  |
| NCI-H720   | Lung   | Lung Carcinoma                         |            | 0.03              | 0.13    | 0.08   | 0.08   | 0.08   | 0.07   | 0.05   | 0.07         | 0.06               | 0.07    | 0.08    | 0.01    | 0.23   | 0.03   | 0.02   | 0.00   | 0.28         | 0.66 | cg14506646  | 0.06    | 0.13    | 0.08    | 0.04   | 0.25   | 0.05   | 0.09   | 0.01         | 0.19 | 0.26 |  |  |  |
| A427       | Lung   | Lung Carcinoma                         |            | 0.35              | 0.12    | 0.08   | 0.12   | 0.08   | 0.07   | 0.02   | 0.08         | 0.06               | 0.07    | 0.08    | 0.01    | 0.23   | 0.03   | 0.02   | 0.00   | 0.28         | 0.66 | cg14506646  | 0.06    | 0.13    | 0.08    | 0.04   | 0.25   | 0.05   | 0.09   | 0.01         | 0.19 | 0.26 |  |  |  |
| COR-L321   | Lung   | Lung Carcinoma                         |            | 0.00              | 0.08    | 0.07   | 0.10   | 0.06   | 0.08   | 0.04   | 0.05         | 0.06               | 0.08    | 0.07    | 0.02    | 0.04   | 0.05   | 0.09   | 0.01   | 0.02         | 0.15 | cg14506646  | 0.06    | 0.13    | 0.08    | 0.04   | 0.25   | 0.05   | 0.09   | 0.01         | 0.19 | 0.26 |  |  |  |
| LU-99A     | Lung   | Lung Giant Cell Carcinoma              |            | 0.01              | 0.07    | 0.06   | 0.09   | 0.07   | 0.05   | 0.02   | 0.06         | 0.05               | 0.08    | 0.08    | 0.01    | 0.02   | 0.05   | 0.02   | 0.00   | 0.01         | 0.13 | cg14506646  | 0.06    | 0.13    | 0.08    | 0.04   | 0.25   | 0.05   | 0.09   | 0.01         | 0.19 | 0.26 |  |  |  |
| NCI-H810   | Lung   | Lung Large Cell Carcinoma              |            | 0.00              | 0.08    | 0.07   | 0.10   | 0.06   | 0.08   | 0.04   | 0.05         | 0.06               | 0.08    | 0.07    | 0.02    | 0.04   | 0.05   | 0.09   | 0.01   | 0.02         | 0.15 | cg14506646  | 0.06    | 0.13    | 0.08    | 0.04   | 0.25   | 0.05   | 0.09   | 0.01         | 0.19 | 0.26 |  |  |  |
| HOP-92     | Lung   | Lung Large Cell Carcinoma              |            | 0.01              | 0.07    | 0.06   | 0.09   | 0.07   | 0.05   | 0.02   | 0.06         | 0.05               | 0.08    | 0.08    | 0.01    | 0.02   | 0.05   | 0.02   | 0.00   | 0.01         | 0.13 | cg14506646  | 0.06    | 0.13    | 0.08    | 0.04   | 0.25   | 0.05   | 0.09   | 0.01         | 0.19 | 0.26 |  |  |  |
| NCI-H1581  | Lung   | Lung Large Cell Carcinoma              |            | 0.00              | 0.08    | 0.07   | 0.09   | 0.06   | 0.08   | 0.04   | 0.05         | 0.05               | 0.09    | 0.08    | 0.03    | 0.31   | 0.04   | 0.05   | 0.03   | 0.30         | 0.24 | cg14506646  | 0.06    | 0.13    | 0.08    | 0.04   | 0.25   | 0.05   | 0.09   | 0.01         | 0.19 | 0.26 |  |  |  |
| LCLC-97TM1 | Lung   | Lung Large Cell Carcinoma              |            | 0.09              | 0.09    | 0.07   | 0.08   | 0.06   | 0.05   | 0.01   | 0.04         | 0.03               | 0.06    | 0.05    | 0.01    | 0.02   | 0.03   | 0.02   | 0.00   | 0.00         | 0.16 | cg14506646  | 0.06    | 0.13    | 0.08    | 0.04   | 0.25   | 0.05   | 0.09   | 0.01         | 0.19 | 0.26 |  |  |  |
| IA-LM      | Lung   | Lung Large Cell Carcinoma              |            | 0.06              | 0.08    | 0.07   | 0.10   | 0.07   | 0.07   | 0.03   | 0.05         | 0.18               | 0.18    | 0.13    | 0.04    | 0.30   | 0.19   | 0.03   | 0.07   | 0.39         | 0.68 | cg14506646  | 0.06    | 0.13    | 0.08    | 0.04   | 0.25   | 0.05   | 0.09   | 0.01         | 0.19 | 0.26 |  |  |  |
| NCI-H650   | Lung   | Lung Large Cell Carcinoma              |            | 0.35              | 0.27    | 0.39   | 0.23   | 0.05   | 0.07   | 0.03   | 0.05         | 0.05               | 0.08    | 0.10    | 0.02    | 0.02   | 0.04   | 0.02   | 0.00   | 0.01         | 0.13 | cg14506646  | 0.06    | 0.13    | 0.08    | 0.04   | 0.25   | 0.05   | 0.09   | 0.01         | 0.19 | 0.26 |  |  |  |
| NCI-H596   | Lung   | Lung Mixed Adenosquamous Carcinoma     |            | 0.01              | 0.08    | 0.07   | 0.11   | 0.07   | 0.07   | 0.04   | 0.05         | 0.06               | 0.09    | 0.07    | 0.01    | 0.14   | 0.03   | 0.02   | 0.01   | 0.15         | 0.18 | cg14506646  | 0.06    | 0.13    | 0.08    | 0.04   | 0.25   | 0.05   | 0.09   | 0.01         | 0.19 | 0.26 |  |  |  |
| NCI-H292   | Lung   | Lung Mucoepidermoid Carcinoma          |            | 0.04              | 0.08    | 0.08   | 0.10   | 0.06   | 0.06   | 0.03   | 0.06         | 0.06               | 0.09    | 0.09    | 0.03    | 0.04   | 0.04   | 0.03   | 0.01   | 0.03         | 0.11 | cg14506646  | 0.06    | 0.13    | 0.08    | 0.04   | 0.25   | 0.05   | 0.09   | 0.01         | 0.19 | 0.26 |  |  |  |
| NCI-H23    | Lung   | Lung Non Small Cell Carcinoma          |            | 0.01              | 0.08    | 0.07   | 0.10   | 0.06   | 0.07   | 0.02   | 0.05         | 0.04               | 0.06    | 0.09    | 0.01    | 0.12   | 0.02   | 0.02   | 0.01   | 0.24         | 0.17 | cg14506646  | 0.06    | 0.13    | 0.08    | 0.04   | 0.25   | 0.05   | 0.09   | 0.01         | 0.19 | 0.26 |  |  |  |
| A549       | Lung   | Lung Non Small Cell Carcinoma          |            | 0.00              | 0.10    | 0.07   | 0.10   | 0.06   | 0.05   | 0.01   | 0.06         | 0.04               | 0.09    | 0.07    | 0.02    | 0.24   | 0.02   | 0.02   | 0.00   | 0.22         | 0.21 | cg14506646  | 0.06    | 0.13    | 0.08    | 0.04   | 0.25   | 0.05   | 0.09   | 0.01         | 0.19 | 0.26 |  |  |  |
| NCI-H1437  | Lung   | Lung Non Small Cell Carcinoma          |            | 0.00              | 0.05    | 0.04   | 0.07   | 0.05   | 0.06   | 0.01   | 0.05         | 0.04               | 0.08    | 0.07    | 0.02    | 0.02   | 0.01   | 0.02   | 0.00   | 0.01         | 0.12 | cg14506646  | 0.06    | 0.13    | 0.08    | 0.04   | 0.25   | 0.05   | 0.09   | 0.01         | 0.19 | 0.26 |  |  |  |
| NCI-H1299  | Lung   | Lung Non Small Cell Carcinoma          |            | 0.00              | 0.06    | 0.05   | 0.07   | 0.05   | 0.06   | 0.02   | 0.06         | 0.06               | 0.07    | 0.08    | 0.02    | 0.21   | 0.02   | 0.04   | 0.01   | 0.17         | 0.31 | cg14506646  | 0.06    | 0.13    | 0.08    | 0.04   | 0.25   | 0.05   | 0.09   | 0.01         | 0.19 | 0.26 |  |  |  |
| NCI-H1975  | Lung   | Lung Non Small Cell Carcinoma          |            | 0.03              | 0.08    | 0.06   | 0.08   | 0.05   | 0.05   | 0.01   | 0.05         | 0.05               | 0.08    | 0.07    | 0.02    | 0.03   | 0.03   | 0.01   | 0.01   | 0.04         | 0.20 | cg14506646  | 0.06    | 0.13    | 0.08    | 0.04   | 0.25   | 0.05   | 0.09   | 0.01         | 0.19 | 0.26 |  |  |  |
| CALU-3     | Lung   | Lung Non Small Cell Carcinoma          |            | 0.01              | 0.11    | 0.10   | 0.11   | 0.09   | 0.09   | 0.02   | 0.10         | 0.07               | 0.10    | 0.12    | 0.02    | 0.03   | 0.04   | 0.03   | 0.00   | 0.01         | 0.15 | cg14506646  | 0.06    | 0.13    | 0.08    | 0.04   | 0.25   | 0.05   | 0.09   | 0.01         | 0.19 | 0.26 |  |  |  |
| CAL-12T    | Lung   | Lung Non Small Cell Carcinoma          |            | 0.01              | 0.12    | 0.06   | 0.07   | 0.06   | 0.06   | 0.03   | 0.06         | 0.05               | 0.10    | 0.08    | 0.02    | 0.03   | 0.04   | 0.03   | 0.01   | 0.06         | 0.49 | cg14506646  | 0.06    | 0.13    | 0.08    | 0.04   | 0.25   | 0.05   | 0.09   | 0.01         | 0.19 | 0.26 |  |  |  |
| PC-14      | Lung   | Lung Non Small Cell Carcinoma          |            | 0.02              | 0.05    | 0.09   | 0.10   | 0.06   | 0.05   | 0.04   | 0.06         | 0.06               | 0.09    | 0.07    | 0.02    | 0.01   | 0.03   | 0.03   | 0.01   | 0.02         | 0.16 | cg14506646  | 0.06    | 0.13    | 0.08    | 0.04   | 0.25   | 0.05   | 0.09   | 0.01         | 0.19 | 0.26 |  |  |  |
| LCLC-103H  | Lung   | Lung Non Small Cell Carcinoma          |            | 0.10              | 0.09    | 0.08   | 0.10   | 0.07   | 0.07   | 0.01   | 0.06         | 0.05               | 0.08    | 0.08    | 0.02    | 0.04   | 0.05   | 0.02   | 0.02   | 0.02         | 0.15 | cg14506646  | 0.0.    |         |         |        |        |        |        |              |      |      |  |  |  |

|             |        |                              | TargetID | UCSC_REFGENE_NAME |         |        |        |        |        |        |               | UCSC_REFGENE_GROUP |         |         |         |        |        |        |        |               |      |      |         |         |         |        |        |        |        |               |      |      |  |  |  |
|-------------|--------|------------------------------|----------|-------------------|---------|--------|--------|--------|--------|--------|---------------|--------------------|---------|---------|---------|--------|--------|--------|--------|---------------|------|------|---------|---------|---------|--------|--------|--------|--------|---------------|------|------|--|--|--|
|             |        |                              |          | DCP2              |         |        |        |        |        |        |               | NUDT16             |         |         |         |        |        |        |        |               |      |      |         |         |         |        |        |        |        |               |      |      |  |  |  |
| Cell Line   | Tissue | Cell Line Type               |          | TSS1500           | TSS1500 | TSS200 | TSS200 | TSS200 | TSS200 | TSS200 | 1stExon;5'UTR | 1stExon            | TSS1500 | TSS1500 | TSS1500 | TSS200 | TSS200 | TSS200 | TSS200 | 5'UTR;1stExon | Body | Body | TSS1500 | TSS1500 | TSS1500 | TSS200 | TSS200 | TSS200 | TSS200 | 5'UTR;1stExon | Body | Body |  |  |  |
| NCI-H1092   | Lung   | Lung Small Cell Carcinoma    |          | 0.01              | 0.08    | 0.07   | 0.08   | 0.05   | 0.06   | 0.04   | 0.03          |                    | 0.06    | 0.08    | 0.07    | 0.02   | 0.23   | 0.03   | 0.03   | 0.01          | 0.03 | 0.19 |         |         |         |        |        |        |        |               |      |      |  |  |  |
| NCI-H1155   | Lung   | Lung Small Cell Carcinoma    |          | 0.01              | 0.08    | 0.07   | 0.08   | 0.05   | 0.06   | 0.01   | 0.05          |                    | 0.04    | 0.09    | 0.07    | 0.01   | 0.25   | 0.04   | 0.03   | 0.00          | 0.40 | 0.36 |         |         |         |        |        |        |        |               |      |      |  |  |  |
| NCI-H1688   | Lung   | Lung Small Cell Carcinoma    |          | 0.03              | 0.09    | 0.06   | 0.09   | 0.05   | 0.06   | 0.01   | 0.04          |                    | 0.04    | 0.08    | 0.06    | 0.02   | 0.01   | 0.03   | 0.02   | 0.01          | 0.00 | 0.13 |         |         |         |        |        |        |        |               |      |      |  |  |  |
| NCI-H2081   | Lung   | Lung Small Cell Carcinoma    |          | 0.01              | 0.09    | 0.06   | 0.10   | 0.06   | 0.05   | 0.04   | 0.04          |                    | 0.07    | 0.08    | 0.07    | 0.02   | 0.20   | 0.05   | 0.01   | 0.00          | 0.17 | 0.28 |         |         |         |        |        |        |        |               |      |      |  |  |  |
| NCI-H2196   | Lung   | Lung Small Cell Carcinoma    |          | 0.00              | 0.10    | 0.05   | 0.10   | 0.06   | 0.07   | 0.03   | 0.05          |                    | 0.05    | 0.08    | 0.07    | 0.02   | 0.01   | 0.03   | 0.02   | 0.00          | 0.05 | 0.44 |         |         |         |        |        |        |        |               |      |      |  |  |  |
| NCI-H209    | Lung   | Lung Small Cell Carcinoma    |          | 0.05              | 0.08    | 0.07   | 0.08   | 0.06   | 0.05   | 0.03   | 0.04          |                    | 0.04    | 0.11    | 0.07    | 0.02   | 0.04   | 0.03   | 0.02   | 0.00          | 0.04 | 0.18 |         |         |         |        |        |        |        |               |      |      |  |  |  |
| NCI-H2029   | Lung   | Lung Small Cell Carcinoma    |          | 0.02              | 0.09    | 0.07   | 0.10   | 0.06   | 0.07   | 0.04   | 0.04          |                    | 0.05    | 0.10    | 0.07    | 0.02   | 0.02   | 0.03   | 0.03   | 0.01          | 0.03 | 0.22 |         |         |         |        |        |        |        |               |      |      |  |  |  |
| NCI-H1694   | Lung   | Lung Small Cell Carcinoma    |          | 0.02              | 0.10    | 0.08   | 0.10   | 0.07   | 0.06   | 0.02   | 0.05          |                    | 0.78    | 0.54    | 0.24    | 0.05   | 0.32   | 0.22   | 0.20   | 0.06          | 0.52 | 0.88 |         |         |         |        |        |        |        |               |      |      |  |  |  |
| RERF-LC-FM  | Lung   | Lung Small Cell Carcinoma    |          | 0.00              | 0.09    | 0.06   | 0.08   | 0.07   | 0.05   | 0.03   | 0.04          |                    | 0.04    | 0.08    | 0.08    | 0.01   | 0.02   | 0.04   | 0.02   | 0.01          | 0.02 | 0.24 |         |         |         |        |        |        |        |               |      |      |  |  |  |
| LU-135      | Lung   | Lung Small Cell Carcinoma    |          | 0.13              | 0.11    | 0.08   | 0.10   | 0.06   | 0.06   | 0.02   | 0.05          |                    | 0.23    | 0.16    | 0.12    | 0.02   | 0.30   | 0.05   | 0.05   | 0.02          | 0.35 | 0.34 |         |         |         |        |        |        |        |               |      |      |  |  |  |
| NCI-H748    | Lung   | Lung Small Cell Carcinoma    |          | 0.00              | 0.11    | 0.08   | 0.09   | 0.06   | 0.07   | 0.02   | 0.05          |                    | 0.04    | 0.06    | 0.07    | 0.02   | 0.33   | 0.03   | 0.03   | 0.00          | 0.19 | 0.23 |         |         |         |        |        |        |        |               |      |      |  |  |  |
| NCI-H378    | Lung   | Lung Small Cell Carcinoma    |          | 0.21              | 0.18    | 0.09   | 0.10   | 0.05   | 0.07   | 0.01   | 0.05          |                    | 0.03    | 0.08    | 0.08    | 0.01   | 0.06   | 0.03   | 0.03   | 0.00          | 0.02 | 0.17 |         |         |         |        |        |        |        |               |      |      |  |  |  |
| NCI-H524    | Lung   | Lung Small Cell Carcinoma    |          | 0.01              | 0.16    | 0.08   | 0.08   | 0.08   | 0.08   | 0.05   | 0.07          |                    | 0.30    | 0.13    | 0.14    | 0.02   | 0.28   | 0.06   | 0.08   | 0.02          | 0.30 | 0.50 |         |         |         |        |        |        |        |               |      |      |  |  |  |
| NCI-H1876   | Lung   | Lung Small Cell Carcinoma    |          | 0.77              | 0.58    | 0.52   | 0.54   | 0.12   | 0.09   | 0.06   | 0.06          |                    | 0.07    | 0.09    | 0.09    | 0.03   | 0.31   | 0.05   | 0.10   | 0.01          | 0.40 | 0.44 |         |         |         |        |        |        |        |               |      |      |  |  |  |
| DMS-79      | Lung   | Lung Small Cell Carcinoma    |          | 0.02              | 0.15    | 0.09   | 0.09   | 0.08   | 0.09   | 0.03   | 0.07          |                    | 0.08    | 0.10    | 0.11    | 0.03   | 0.33   | 0.05   | 0.12   | 0.01          | 0.34 | 0.34 |         |         |         |        |        |        |        |               |      |      |  |  |  |
| NCI-H1417   | Lung   | Lung Small Cell Carcinoma    |          | 0.01              | 0.11    | 0.07   | 0.08   | 0.07   | 0.07   | 0.05   | 0.06          |                    | 0.05    | 0.16    | 0.07    | 0.02   | 0.02   | 0.04   | 0.02   | 0.00          | 0.04 | 0.24 |         |         |         |        |        |        |        |               |      |      |  |  |  |
| NCI-H1436   | Lung   | Lung Small Cell Carcinoma    |          | 0.03              | 0.12    | 0.09   | 0.12   | 0.08   | 0.08   | 0.03   | 0.07          |                    | 0.06    | 0.09    | 0.08    | 0.02   | 0.28   | 0.03   | 0.07   | 0.01          | 0.28 | 0.47 |         |         |         |        |        |        |        |               |      |      |  |  |  |
| COR-L311    | Lung   | Lung Small Cell Carcinoma    |          | 0.01              | 0.11    | 0.08   | 0.10   | 0.07   | 0.08   | 0.03   | 0.08          |                    | 0.06    | 0.10    | 0.09    | 0.03   | 0.31   | 0.05   | 0.09   | 0.01          | 0.30 | 0.39 |         |         |         |        |        |        |        |               |      |      |  |  |  |
| COR-L303    | Lung   | Lung Small Cell Carcinoma    |          | 0.01              | 0.11    | 0.07   | 0.10   | 0.07   | 0.07   | 0.03   | 0.06          |                    | 0.05    | 0.09    | 0.08    | 0.03   | 0.28   | 0.04   | 0.06   | 0.01          | 0.13 | 0.46 |         |         |         |        |        |        |        |               |      |      |  |  |  |
| NCI-H1836   | Lung   | Lung Small Cell Carcinoma    |          | 0.03              | 0.13    | 0.07   | 0.09   | 0.08   | 0.06   | 0.05   | 0.07          |                    | 0.08    | 0.11    | 0.08    | 0.02   | 0.24   | 0.06   | 0.08   | 0.01          | 0.14 | 0.22 |         |         |         |        |        |        |        |               |      |      |  |  |  |
| COR-L279    | Lung   | Lung Small Cell Carcinoma    |          | 0.02              | 0.12    | 0.09   | 0.10   | 0.08   | 0.09   | 0.03   | 0.07          |                    | 0.07    | 0.10    | 0.09    | 0.03   | 0.04   | 0.04   | 0.03   | 0.01          | 0.02 | 0.20 |         |         |         |        |        |        |        |               |      |      |  |  |  |
| NCI-H1048   | Lung   | Lung Small Cell Carcinoma    |          | 0.01              | 0.11    | 0.09   | 0.11   | 0.08   | 0.08   | 0.05   | 0.07          |                    | 0.06    | 0.11    | 0.09    | 0.03   | 0.33   | 0.04   | 0.08   | 0.01          | 0.27 | 0.22 |         |         |         |        |        |        |        |               |      |      |  |  |  |
| NCI-H847    | Lung   | Lung Small Cell Carcinoma    |          | 0.02              | 0.13    | 0.09   | 0.11   | 0.07   | 0.09   | 0.02   | 0.08          |                    | 0.06    | 0.13    | 0.11    | 0.03   | 0.32   | 0.07   | 0.09   | 0.01          | 0.28 | 0.27 |         |         |         |        |        |        |        |               |      |      |  |  |  |
| DMS-273     | Lung   | Lung Small Cell Carcinoma    |          | 0.13              | 0.16    | 0.13   | 0.11   | 0.09   | 0.10   | 0.05   | 0.08          |                    | 0.21    | 0.11    | 0.09    | 0.03   | 0.32   | 0.05   | 0.07   | 0.01          | 0.29 | 0.32 |         |         |         |        |        |        |        |               |      |      |  |  |  |
| NCI-H2141   | Lung   | Lung Small Cell Carcinoma    |          | 0.00              | 0.07    | 0.04   | 0.06   | 0.06   | 0.07   | 0.03   | 0.05          |                    | 0.05    | 0.08    | 0.07    | 0.02   | 0.30   | 0.03   | 0.05   | 0.01          | 0.24 | 0.15 |         |         |         |        |        |        |        |               |      |      |  |  |  |
| NCI-H250    | Lung   | Lung Small Cell Carcinoma    |          | 0.01              | 0.14    | 0.09   | 0.10   | 0.08   | 0.09   | 0.04   | 0.08          |                    | 0.06    | 0.10    | 0.09    | 0.02   | 0.06   | 0.04   | 0.05   | 0.01          | 0.33 | 0.42 |         |         |         |        |        |        |        |               |      |      |  |  |  |
| NCI-H510A   | Lung   | Lung Small Cell Carcinoma    |          | 0.01              | 0.07    | 0.06   | 0.07   | 0.04   | 0.05   | 0.03   | 0.04          |                    | 0.03    | 0.06    | 0.05    | 0.01   | 0.01   | 0.03   | 0.03   | 0.01          | 0.01 | 0.11 |         |         |         |        |        |        |        |               |      |      |  |  |  |
| NCI-H1304   | Lung   | Lung Small Cell Carcinoma    |          | 0.42              | 0.35    | 0.48   | 0.39   | 0.13   | 0.07   | 0.03   | 0.05          |                    | 0.06    | 0.07    | 0.06    | 0.01   | 0.10   | 0.03   | 0.03   | 0.00          | 0.22 | 0.48 |         |         |         |        |        |        |        |               |      |      |  |  |  |
| SW1271      | Lung   | Lung Small Cell Carcinoma    |          | 0.04              | 0.09    | 0.08   | 0.11   | 0.07   | 0.06   | 0.01   | 0.06          |                    | 0.05    | 0.10    | 0.07    | 0.00   | 0.02   | 0.02   | 0.01   | 0.01          | 0.01 | 0.20 |         |         |         |        |        |        |        |               |      |      |  |  |  |
| COR-L95     | Lung   | Lung Small Cell Carcinoma    |          | 0.02              | 0.11    | 0.08   | 0.09   | 0.07   | 0.07   | 0.03   | 0.06          |                    | 0.04    | 0.09    | 0.07    | 0.02   | 0.30   | 0.03   | 0.03   | 0.01          | 0.20 | 0.34 |         |         |         |        |        |        |        |               |      |      |  |  |  |
| NCI-H226    | Lung   | Lung Squamous Cell Carcinoma |          | 0.01              | 0.09    | 0.07   | 0.09   | 0.06   | 0.05   | 0.01   | 0.05          |                    | 0.04    | 0.07    | 0.07    | 0.02   | 0.02   | 0.03   | 0.02   | 0.00          | 0.05 | 0.14 |         |         |         |        |        |        |        |               |      |      |  |  |  |
| NCI-H520    | Lung   | Lung Squamous Cell Carcinoma |          | 0.05              | 0.07    | 0.08   | 0.12   | 0.08   | 0.08   | 0.03   | 0.07          |                    | 0.05    | 0.08    | 0.10    | 0.03   | 0.15   | 0.04   | 0.03   | 0.01          | 0.16 | 0.20 |         |         |         |        |        |        |        |               |      |      |  |  |  |
| EBC-1       | Lung   | Lung Squamous Cell Carcinoma |          | 0.04              | 0.09    | 0.06   | 0.09   | 0.06   | 0.07   | 0.05   | 0.05          |                    | 0.07    | 0.09    | 0.08    | 0.02   | 0.03   | 0.03   | 0.02   | 0.01          | 0.28 | 0.55 |         |         |         |        |        |        |        |               |      |      |  |  |  |
| SK-MES-1    | Lung   | Lung Squamous Cell Carcinoma |          | 0.00              | 0.08    | 0.08   | 0.11   | 0.06   | 0.07   | 0.03   | 0.06          |                    | 0.05    | 0.09    | 0.09    | 0.02   | 0.04   | 0.03   | 0.03   | 0.00          | 0.01 | 0.13 |         |         |         |        |        |        |        |               |      |      |  |  |  |
| LC-1F       | Lung   | Lung Squamous Cell Carcinoma |          | 0.01              | 0.11    | 0.09   | 0.12   | 0.07   | 0.07   | 0.02   | 0.07          |                    | 0.04    | 0.09    | 0.07    | 0.03   | 0.32   | 0.04   | 0.03   | 0.01          | 0.29 | 0.24 |         |         |         |        |        |        |        |               |      |      |  |  |  |
| KNS-62      | Lung   | Lung Squamous Cell Carcinoma |          | 0.00              | 0.09    | 0.07   | 0.09   | 0.06   | 0.07   | 0.04   | 0.06          |                    | 0.05    | 0.09    | 0.08    | 0.02   | 0.00   | 0.03   | 0.02   | 0.00          | 0.01 | 0.15 |         |         |         |        |        |        |        |               |      |      |  |  |  |
| LOU-NH91    | Lung   | Lung Squamous Cell Carcinoma |          | 0.00              | 0.07    | 0.08   | 0.12   | 0.07   | 0.08   | 0.04   | 0.04          |                    | 0.05    | 0.10    | 0.11    | 0.02   | 0.02   | 0.04   | 0.01   | 0.01          | 0.11 | 0.31 |         |         |         |        |        |        |        |               |      |      |  |  |  |
| RERF-LC-SQ1 | Lung   | Lung Squamous Cell Carcinoma |          | 0.00              | 0.10    | 0.07   | 0.09   | 0.07   | 0.06   | 0.03   | 0.05          |                    | 0.05    | 0.09    | 0.07    | 0.02   | 0.15   | 0.02   | 0.03   | 0.01          | 0.32 | 0.39 |         |         |         |        |        |        |        |               |      |      |  |  |  |
|             |        |                              |          |                   |         |        |        |        |        |        |               |                    |         |         |         |        |        |        |        |               |      |      |         |         |         |        |        |        |        |               |      |      |  |  |  |

|             |          |                                  | TargetID |      | UCSC_REFGENE_NAME |         |        |        |        |        |              |         | UCSC_REFGENE_GROUP |         |         |        |        |        |        |              |      |      |  |  |  |  |  |  |
|-------------|----------|----------------------------------|----------|------|-------------------|---------|--------|--------|--------|--------|--------------|---------|--------------------|---------|---------|--------|--------|--------|--------|--------------|------|------|--|--|--|--|--|--|
|             |          |                                  |          |      |                   |         |        |        |        |        |              |         |                    |         |         |        |        |        |        |              |      |      |  |  |  |  |  |  |
|             |          |                                  |          |      | DCP2              |         |        |        |        |        |              |         | NUDT16             |         |         |        |        |        |        |              |      |      |  |  |  |  |  |  |
|             |          |                                  |          |      | TSS1500           | TSS1500 | TSS200 | TSS200 | TSS200 | TSS200 | 1stExon;5UTR | 1stExon | TSS1500            | TSS1500 | TSS1500 | TSS200 | TSS200 | TSS200 | TSS200 | 5UTR;1stExon | Body | Body |  |  |  |  |  |  |
| Cell Line   | Tissue   | Cell Line Type                   |          |      |                   |         |        |        |        |        |              |         |                    |         |         |        |        |        |        |              |      |      |  |  |  |  |  |  |
| OVTOKO      | Ovary    | Ovary Adenocarcinoma             | 0.01     | 0.14 | 0.09              | 0.12    | 0.08   | 0.09   | 0.05   | 0.08   | 0.07         | 0.10    | 0.09               | 0.03    | 0.31    | 0.06   | 0.08   | 0.01   | 0.33   | 0.25         |      |      |  |  |  |  |  |  |
| OVCAR-4     | Ovary    | Ovary Carcinoma                  | 0.00     | 0.08 | 0.06              | 0.09    | 0.06   | 0.05   | 0.01   | 0.05   | 0.05         | 0.07    | 0.08               | 0.02    | 0.05    | 0.02   | 0.03   | 0.02   | 0.18   | 0.20         |      |      |  |  |  |  |  |  |
| OVCAR-8     | Ovary    | Ovary Carcinoma                  | 0.01     | 0.10 | 0.08              | 0.10    | 0.06   | 0.05   | 0.02   | 0.06   | 0.06         | 0.08    | 0.10               | 0.02    | 0.23    | 0.04   | 0.02   | 0.01   | 0.21   | 0.21         |      |      |  |  |  |  |  |  |
| KURAMOCHI   | Ovary    | Ovary Carcinoma                  | 0.00     | 0.10 | 0.06              | 0.07    | 0.05   | 0.05   | 0.03   | 0.04   | 0.06         | 0.08    | 0.10               | 0.02    | 0.20    | 0.02   | 0.04   | 0.01   | 0.21   | 0.21         |      |      |  |  |  |  |  |  |
| OAW-28      | Ovary    | Ovary Carcinoma                  | 0.02     | 0.09 | 0.07              | 0.09    | 0.06   | 0.07   | 0.02   | 0.07   | 0.05         | 0.09    | 0.13               | 0.02    | 0.23    | 0.05   | 0.04   | 0.01   | 0.22   | 0.21         |      |      |  |  |  |  |  |  |
| FU-OV-1     | Ovary    | Ovary Carcinoma                  | 0.00     | 0.10 | 0.08              | 0.08    | 0.07   | 0.07   | 0.01   | 0.05   | 0.06         | 0.08    | 0.11               | 0.02    | 0.31    | 0.04   | 0.03   | 0.01   | 0.24   | 0.21         |      |      |  |  |  |  |  |  |
| OVCA420     | Ovary    | Ovary Carcinoma                  | 0.02     | 0.12 | 0.08              | 0.11    | 0.08   | 0.08   | 0.05   | 0.07   | 0.06         | 0.06    | 0.09               | 0.03    | 0.20    | 0.03   | 0.07   | 0.01   | 0.28   | 0.23         |      |      |  |  |  |  |  |  |
| OV-7        | Ovary    | Ovary Carcinoma                  | 0.01     | 0.14 | 0.10              | 0.12    | 0.09   | 0.09   | 0.02   | 0.08   | 0.08         | 0.10    | 0.11               | 0.02    | 0.03    | 0.03   | 0.03   | 0.01   | 0.02   | 0.17         |      |      |  |  |  |  |  |  |
| PEO1        | Ovary    | Ovary Carcinoma                  | 0.09     | 0.15 | 0.09              | 0.13    | 0.07   | 0.08   | 0.02   | 0.08   | 0.07         | 0.14    | 0.09               | 0.02    | 0.03    | 0.05   | 0.03   | 0.01   | 0.06   | 0.04         |      |      |  |  |  |  |  |  |
| TYK-NU      | Ovary    | Ovary Carcinoma                  | 0.41     | 0.28 | 0.22              | 0.16    | 0.08   | 0.09   | 0.04   | 0.07   | 0.46         | 0.47    | 0.40               | 0.38    | 0.53    | 0.54   | 0.54   | 0.53   | 0.92   | 0.94         |      |      |  |  |  |  |  |  |
| OVCAR-5     | Ovary    | Ovary Carcinoma                  | 0.01     | 0.16 | 0.10              | 0.12    | 0.10   | 0.10   | 0.04   | 0.08   | 0.07         | 0.12    | 0.09               | 0.01    | 0.11    | 0.04   | 0.04   | 0.01   | 0.03   | 0.09         |      |      |  |  |  |  |  |  |
| DOV13       | Ovary    | Ovary Carcinoma                  | 0.10     | 0.10 | 0.06              | 0.09    | 0.06   | 0.05   | 0.02   | 0.06   | 0.04         | 0.07    | 0.06               | 0.02    | 0.09    | 0.04   | 0.03   | 0.01   | 0.06   | 0.12         |      |      |  |  |  |  |  |  |
| Hey         | Ovary    | Ovary Carcinoma                  | 0.25     | 0.09 | 0.07              | 0.10    | 0.06   | 0.07   | 0.03   | 0.06   | 0.05         | 0.07    | 0.09               | 0.02    | 0.16    | 0.05   | 0.02   | 0.01   | 0.20   | 0.20         |      |      |  |  |  |  |  |  |
| OVCA433     | Ovary    | Ovary Carcinoma                  | 0.77     | 0.18 | 0.23              | 0.16    | 0.08   | 0.07   | 0.01   | 0.06   | 0.04         | 0.08    | 0.10               | 0.02    | 0.28    | 0.03   | 0.03   | 0.00   | 0.20   | 0.23         |      |      |  |  |  |  |  |  |
| ES-2        | Ovary    | Ovary Carcinoma (Clear Cell)     | 0.05     | 0.10 | 0.07              | 0.08    | 0.06   | 0.07   | 0.02   | 0.06   | 0.04         | 0.07    | 0.10               | 0.02    | 0.28    | 0.03   | 0.03   | 0.00   | 0.20   | 0.23         |      |      |  |  |  |  |  |  |
| RMG-1       | Ovary    | Ovary Carcinoma (Clear Cell)     | 0.01     | 0.10 | 0.07              | 0.09    | 0.06   | 0.07   | 0.03   | 0.05   | 0.04         | 0.08    | 0.10               | 0.02    | 0.24    | 0.03   | 0.02   | 0.01   | 0.21   | 0.21         |      |      |  |  |  |  |  |  |
| EFO-27      | Ovary    | Ovary Carcinoma (Mucinous)       | 0.01     | 0.06 | 0.10              | 0.09    | 0.07   | 0.06   | 0.02   | 0.06   | 0.05         | 0.09    | 0.08               | 0.02    | 0.29    | 0.04   | 0.02   | 0.01   | 0.27   | 0.18         |      |      |  |  |  |  |  |  |
| OAW-42      | Ovary    | Ovary Carcinoma (Mucinous)       | 0.01     | 0.10 | 0.08              | 0.09    | 0.07   | 0.07   | 0.04   | 0.07   | 0.06         | 0.08    | 0.10               | 0.04    | 0.31    | 0.04   | 0.05   | 0.02   | 0.31   | 0.24         |      |      |  |  |  |  |  |  |
| EFO-21      | Ovary    | Ovary Carcinoma (Serosus)        | 0.01     | 0.08 | 0.08              | 0.10    | 0.05   | 0.07   | 0.01   | 0.05   | 0.04         | 0.06    | 0.08               | 0.02    | 0.09    | 0.02   | 0.02   | 0.00   | 0.25   | 0.22         |      |      |  |  |  |  |  |  |
| QC-314      | Ovary    | Ovary Carcinoma (Serosus)        | 0.02     | 0.10 | 0.06              | 0.09    | 0.06   | 0.06   | 0.02   | 0.04   | 0.03         | 0.07    | 0.07               | 0.01    | 0.22    | 0.03   | 0.02   | 0.00   | 0.21   | 0.19         |      |      |  |  |  |  |  |  |
| PA-1        | Ovary    | Ovary Teratoma                   | 0.02     | 0.09 | 0.09              | 0.09    | 0.06   | 0.06   | 0.02   | 0.05   | 0.05         | 0.08    | 0.09               | 0.02    | 0.32    | 0.05   | 0.03   | 0.01   | 0.30   | 0.27         |      |      |  |  |  |  |  |  |
| SU8686      | Pancreas | Adenocarcinoma                   | 0.01     | 0.16 | 0.11              | 0.12    | 0.08   | 0.09   | 0.04   | 0.07   | 0.07         | 0.11    | 0.11               | 0.03    | 0.06    | 0.11   | 0.03   | 0.01   | 0.03   | 0.19         |      |      |  |  |  |  |  |  |
| QGP-1       | Pancreas | Islet Cell Carcinoma             | 0.01     | 0.14 | 0.08              | 0.10    | 0.07   | 0.09   | 0.05   | 0.06   | 0.06         | 0.12    | 0.13               | 0.02    | 0.36    | 0.05   | 0.08   | 0.00   | 0.33   | 0.26         |      |      |  |  |  |  |  |  |
| PL18        | Pancreas | Ns                               | 0.02     | 0.06 | 0.09              | 0.12    | 0.08   | 0.07   | 0.02   | 0.07   | 0.06         | 0.08    | 0.09               | 0.02    | 0.10    | 0.02   | 0.03   | 0.01   | 0.06   | 0.17         |      |      |  |  |  |  |  |  |
| HS-766T     | Pancreas | Pancreas Adenocarcinoma          | 0.11     | 0.07 | 0.10              | 0.11    | 0.08   | 0.08   | 0.03   | 0.06   | 0.05         | 0.11    | 0.09               | 0.02    | 0.05    | 0.02   | 0.02   | 0.01   | 0.03   | 0.19         |      |      |  |  |  |  |  |  |
| HPAC        | Pancreas | Pancreas Adenocarcinoma          | 0.02     | 0.15 | 0.08              | 0.11    | 0.07   | 0.08   | 0.05   | 0.08   | 0.06         | 0.11    | 0.09               | 0.03    | 0.03    | 0.05   | 0.03   | 0.01   | 0.01   | 0.17         |      |      |  |  |  |  |  |  |
| PA-TU-8988T | Pancreas | Pancreas Adenocarcinoma          | 0.04     | 0.08 | 0.10              | 0.13    | 0.08   | 0.09   | 0.02   | 0.08   | 0.06         | 0.09    | 0.11               | 0.02    | 0.15    | 0.04   | 0.02   | 0.01   | 0.16   | 0.22         |      |      |  |  |  |  |  |  |
| DAN-G       | Pancreas | Pancreas Adenocarcinoma          | 0.03     | 0.09 | 0.09              | 0.11    | 0.08   | 0.08   | 0.02   | 0.07   | 0.07         | 0.11    | 0.09               | 0.02    | 0.06    | 0.03   | 0.02   | 0.01   | 0.04   | 0.22         |      |      |  |  |  |  |  |  |
| PANC-02-03  | Pancreas | Pancreas Adenocarcinoma          | 0.59     | 0.18 | 0.12              | 0.11    | 0.09   | 0.10   | 0.04   | 0.08   | 0.07         | 0.11    | 0.11               | 0.03    | 0.04    | 0.05   | 0.04   | 0.01   | 0.03   | 0.17         |      |      |  |  |  |  |  |  |
| PA-TU-8902  | Pancreas | Pancreas Adenocarcinoma          | 0.11     | 0.13 | 0.09              | 0.12    | 0.08   | 0.08   | 0.04   | 0.07   | 0.08         | 0.11    | 0.09               | 0.03    | 0.03    | 0.04   | 0.03   | 0.01   | 0.39   | 0.51         |      |      |  |  |  |  |  |  |
| PANC-04-03  | Pancreas | Pancreas Adenocarcinoma          | 0.12     | 0.14 | 0.09              | 0.13    | 0.08   | 0.09   | 0.05   | 0.08   | 0.06         | 0.14    | 0.10               | 0.02    | 0.04    | 0.04   | 0.03   | 0.01   | 0.05   | 0.16         |      |      |  |  |  |  |  |  |
| KP-3        | Pancreas | Pancreas Adenosquamous Carcinoma | 0.03     | 0.15 | 0.07              | 0.10    | 0.08   | 0.08   | 0.05   | 0.07   | 0.06         | 0.09    | 0.10               | 0.03    | 0.14    | 0.06   | 0.05   | 0.01   | 0.21   | 0.22         |      |      |  |  |  |  |  |  |
| HUP-T4      | Pancreas | Pancreas Carcinoma               | 0.01     | 0.08 | 0.07              | 0.10    | 0.07   | 0.06   | 0.04   | 0.07   | 0.06         | 0.10    | 0.11               | 0.02    | 0.04    | 0.04   | 0.03   | 0.00   | 0.02   | 0.13         |      |      |  |  |  |  |  |  |
| YAPC        | Pancreas | Pancreas Carcinoma               | 0.01     | 0.08 | 0.09              | 0.11    | 0.09   | 0.07   | 0.02   | 0.07   | 0.06         | 0.10    | 0.09               | 0.03    | 0.04    | 0.04   | 0.02   | 0.01   | 0.03   | 0.13         |      |      |  |  |  |  |  |  |
| PL4         | Pancreas | Pancreas Carcinoma               | 0.01     | 0.10 | 0.07              | 0.09    | 0.06   | 0.08   | 0.02   | 0.05   | 0.04         | 0.08    | 0.07               | 0.01    | 0.02    | 0.03   | 0.01   | 0.01   | 0.11   | 0.21         |      |      |  |  |  |  |  |  |
| KP-1N       | Pancreas | Pancreas Carcinoma               | 0.01     | 0.07 | 0.10              | 0.11    | 0.08   | 0.09   | 0.02   | 0.08   | 0.07         | 0.10    | 0.09               | 0.03    | 0.18    | 0.03   | 0.02   | 0.01   | 0.15   | 0.21         |      |      |  |  |  |  |  |  |
| BXPC-3      | Pancreas | Pancreas Ductal Carcinoma        | 0.00     | 0.05 | 0.08              | 0.09    | 0.04   | 0.05   | 0.01   | 0.05   | 0.04         | 0.06    | 0.08               | 0.02    | 0.04    | 0.02   | 0.02   | 0.01   | 0.02   | 0.15         |      |      |  |  |  |  |  |  |
| SW1990      | Pancreas | Pancreas Ductal Carcinoma        | 0.00     | 0.11 | 0.08              | 0.09    | 0.06   | 0.07   | 0.04   | 0.06   | 0.05         | 0.11    | 0.10               | 0.02    | 0.04    | 0.07   | 0.04   | 0.01   | 0.02   | 0.07         |      |      |  |  |  |  |  |  |
| HPAF-II     | Pancreas | Pancreas Ductal Carcinoma        | 0.08     | 0.14 | 0.09              | 0.11    | 0.08   | 0.09   | 0.05   | 0.10   | 0.06         | 0.10    | 0.12               | 0.03    | 0.04    | 0.05   | 0.04   | 0.01   | 0.02   | 0.17         |      |      |  |  |  |  |  |  |
| PANC-10-05  | Pancreas | Pancreas Ductal Carcinoma        | 0.06     | 0.11 | 0.07              | 0.10    | 0.06   | 0.07   | 0.05   | 0.06   | 0.05         | 0.11    | 0.08               | 0.02    | 0.05    | 0.04   | 0.03   | 0.02   | 0.06   | 0.12         |      |      |  |  |  |  |  |  |
| PSN1        | Pancreas | Pancreas Ductal Carcinoma        | 0.00     | 0.11 | 0.07              | 0.10    | 0.06   | 0.06   | 0.03   | 0.05   | 0.05         | 0.10    | 0.08               | 0.02    | 0.06    | 0.06   | 0.04   | 0.02   | 0.02   | 0.14         |      |      |  |  |  |  |  |  |
| PANC-08-13  | Pancreas | Pancreas Ductal Carcinoma        | 0.02     | 0.14 | 0.09              | 0.12    | 0.07   | 0.08   | 0.04   | 0.07   | 0.07         | 0.11    | 0.09               | 0.03    | 0.06    | 0.05   | 0.04   | 0.     |        |              |      |      |  |  |  |  |  |  |

|             |                 |                                                             | TargetID   | UCSC_REFGENE_NAME |         |        |        |        |        |              |         | UCSC_REFGENE_GROUP |         |         |        |        |        |              |      |      |      |  |  |
|-------------|-----------------|-------------------------------------------------------------|------------|-------------------|---------|--------|--------|--------|--------|--------------|---------|--------------------|---------|---------|--------|--------|--------|--------------|------|------|------|--|--|
|             |                 |                                                             |            | DCP2              |         |        |        |        |        |              |         | NUDT16             |         |         |        |        |        |              |      |      |      |  |  |
| Cell Line   | Tissue          | Cell Line Type                                              |            | TSS1500           | TSS1500 | TSS200 | TSS200 | TSS200 | TSS200 | 1stExon;5UTR | 1stExon | TSS1500            | TSS1500 | TSS1500 | TSS200 | TSS200 | TSS200 | 5UTR;1stExon | Body | Body |      |  |  |
| WM35        | Skin            | Malignant Melanoma                                          | cg21539223 | 0.01              | 0.09    | 0.09   | 0.10   | 0.06   | 0.07   | 0.03         | 0.08    | 0.06               | 0.10    | 0.12    | 0.02   | 0.28   | 0.04   | 0.05         | 0.01 | 0.27 | 0.22 |  |  |
| G-361       | Skin            | Malignant Melanoma                                          | cg16456337 | 0.01              | 0.07    | 0.06   | 0.11   | 0.08   | 0.07   | 0.04         | 0.08    | 0.06               | 0.11    | 0.17    | 0.03   | 0.26   | 0.05   | 0.04         | 0.01 | 0.14 | 0.21 |  |  |
| LB373-MEL-D | Skin            | Malignant Melanoma                                          | cg15956794 | 0.01              | 0.10    | 0.07   | 0.10   | 0.07   | 0.06   | 0.04         | 0.07    | 0.05               | 0.11    | 0.14    | 0.03   | 0.27   | 0.07   | 0.03         | 0.01 | 0.22 | 0.19 |  |  |
| SK-MEL-30   | Skin            | Malignant Melanoma                                          | cg14773728 | 0.02              | 0.10    | 0.09   | 0.10   | 0.07   | 0.07   | 0.03         | 0.06    | 0.06               | 0.11    | 0.09    | 0.02   | 0.31   | 0.04   | 0.03         | 0.01 | 0.26 | 0.23 |  |  |
| LB2518-MEL  | Skin            | Malignant Melanoma                                          | cg17573603 | 0.00              | 0.11    | 0.08   | 0.11   | 0.07   | 0.06   | 0.03         | 0.06    | 0.06               | 0.09    | 0.10    | 0.02   | 0.28   | 0.04   | 0.04         | 0.01 | 0.25 | 0.25 |  |  |
| HS-944-T    | Skin            | Malignant Melanoma                                          | cg17919331 | 0.02              | 0.10    | 0.08   | 0.12   | 0.07   | 0.09   | 0.04         | 0.07    | 0.05               | 0.11    | 0.13    | 0.02   | 0.28   | 0.04   | 0.04         | 0.02 | 0.22 | 0.19 |  |  |
| G-MEL       | Skin            | Malignant Melanoma                                          | cg23965551 | 0.00              | 0.09    | 0.08   | 0.09   | 0.06   | 0.07   | 0.03         | 0.06    | 0.04               | 0.08    | 0.12    | 0.02   | 0.07   | 0.11   | 0.03         | 0.01 | 0.05 | 0.17 |  |  |
| RPMI-7951   | Skin            | Malignant Melanoma                                          | cg00522636 | 0.02              | 0.10    | 0.08   | 0.10   | 0.07   | 0.08   | 0.04         | 0.09    | 0.06               | 0.12    | 0.14    | 0.02   | 0.14   | 0.06   | 0.03         | 0.01 | 0.10 | 0.18 |  |  |
| CP50-MEL-B  | Skin            | Malignant Melanoma                                          | cg13518195 | 0.02              | 0.12    | 0.08   | 0.09   | 0.08   | 0.09   | 0.02         | 0.05    | 0.06               | 0.09    | 0.12    | 0.02   | 0.31   | 0.07   | 0.04         | 0.01 | 0.27 | 0.19 |  |  |
| CP66-MEL    | Skin            | Malignant Melanoma                                          | cg26455900 | 0.24              | 0.09    | 0.07   | 0.09   | 0.05   | 0.06   | 0.02         | 0.05    | 0.04               | 0.07    | 0.07    | 0.01   | 0.29   | 0.03   | 0.02         | 0.01 | 0.28 | 0.22 |  |  |
| MZ7-MEL     | Skin            | Malignant Melanoma                                          | cg01092811 | 0.00              | 0.09    | 0.06   | 0.09   | 0.06   | 0.07   | 0.03         | 0.06    | 0.04               | 0.07    | 0.09    | 0.01   | 0.28   | 0.03   | 0.02         | 0.01 | 0.21 | 0.21 |  |  |
| WM278       | Skin            | Malignant Melanoma                                          | cg06363041 | 0.02              | 0.08    | 0.06   | 0.08   | 0.06   | 0.08   | 0.02         | 0.06    | 0.04               | 0.07    | 0.12    | 0.02   | 0.24   | 0.04   | 0.03         | 0.02 | 0.23 | 0.21 |  |  |
| RVH-421     | Skin            | Malignant Melanoma                                          | cg25437259 | 0.00              | 0.08    | 0.06   | 0.08   | 0.05   | 0.07   | 0.01         | 0.04    | 0.04               | 0.08    | 0.07    | 0.01   | 0.31   | 0.01   | 0.02         | 0.00 | 0.27 | 0.17 |  |  |
| SK-MEL-3    | Skin            | Malignant Melanoma                                          | cg14506646 | 0.01              | 0.10    | 0.07   | 0.10   | 0.07   | 0.07   | 0.03         | 0.05    | 0.06               | 0.09    | 0.09    | 0.02   | 0.29   | 0.04   | 0.02         | 0.01 | 0.28 | 0.19 |  |  |
| CHL-1       | Skin            | Malignant Melanoma                                          | cg14861603 | 0.02              | 0.10    | 0.07   | 0.10   | 0.06   | 0.06   | 0.04         | 0.05    | 0.05               | 0.11    | 0.08    | 0.02   | 0.32   | 0.05   | 0.02         | 0.00 | 0.25 | 0.25 |  |  |
| COLO-679    | Skin            | Malignant Melanoma                                          | cg11162249 | 0.02              | 0.10    | 0.08   | 0.11   | 0.06   | 0.07   | 0.05         | 0.04    | 0.04               | 0.13    | 0.10    | 0.02   | 0.29   | 0.04   | 0.03         | 0.00 | 0.28 | 0.23 |  |  |
| IST-MEL1    | Skin            | Malignant Melanoma                                          | cg17799800 | 0.05              | 0.12    | 0.07   | 0.09   | 0.07   | 0.07   | 0.02         | 0.06    | 0.05               | 0.11    | 0.12    | 0.02   | 0.27   | 0.04   | 0.03         | 0.01 | 0.23 | 0.43 |  |  |
| MEL-HO      | Skin            | Malignant Melanoma                                          | cg00261665 | 0.01              | 0.10    | 0.08   | 0.08   | 0.07   | 0.08   | 0.03         | 0.06    | 0.04               | 0.08    | 0.10    | 0.01   | 0.26   | 0.04   | 0.05         | 0.00 | 0.22 | 0.22 |  |  |
| COLO-800    | Skin            | Malignant Melanoma                                          |            | 0.06              | 0.10    | 0.06   | 0.09   | 0.07   | 0.08   | 0.04         | 0.05    | 0.27               | 0.17    | 0.15    | 0.04   | 0.34   | 0.17   | 0.26         | 0.18 | 0.25 | 0.26 |  |  |
| CP67-MEL    | Skin            | Malignant Melanoma                                          |            | 0.03              | 0.11    | 0.09   | 0.10   | 0.07   | 0.06   | 0.06         | 0.05    | 0.04               | 0.11    | 0.07    | 0.03   | 0.31   | 0.04   | 0.04         | 0.01 | 0.12 | 0.25 |  |  |
| MEL-JUSO    | Skin            | Malignant Melanoma                                          |            | 0.02              | 0.11    | 0.08   | 0.12   | 0.07   | 0.07   | 0.05         | 0.07    | 0.05               | 0.11    | 0.09    | 0.02   | 0.27   | 0.05   | 0.04         | 0.02 | 0.27 | 0.23 |  |  |
| MEWO        | Skin            | Malignant Melanoma                                          |            | 0.00              | 0.11    | 0.07   | 0.09   | 0.06   | 0.07   | 0.02         | 0.05    | 0.04               | 0.09    | 0.08    | 0.01   | 0.10   | 0.04   | 0.03         | 0.01 | 0.03 | 0.20 |  |  |
| A375        | Skin            | Malignant Melanoma                                          |            | 0.01              | 0.10    | 0.08   | 0.10   | 0.08   | 0.08   | 0.05         | 0.08    | 0.06               | 0.11    | 0.14    | 0.03   | 0.27   | 0.05   | 0.04         | 0.02 | 0.18 | 0.19 |  |  |
| HMV-II      | Skin            | Malignant Melanoma                                          |            | 0.01              | 0.09    | 0.07   | 0.11   | 0.07   | 0.05   | 0.06         | 0.05    | 0.06               | 0.11    | 0.13    | 0.01   | 0.30   | 0.07   | 0.03         | 0.01 | 0.26 | 0.21 |  |  |
| HT-144      | Skin            | Malignant Melanoma                                          |            | 0.02              | 0.08    | 0.07   | 0.09   | 0.07   | 0.08   | 0.02         | 0.06    | 0.06               | 0.11    | 0.10    | 0.03   | 0.31   | 0.05   | 0.03         | 0.01 | 0.11 | 0.17 |  |  |
| A101D       | Skin            | Malignant Melanoma                                          |            | 0.00              | 0.10    | 0.08   | 0.09   | 0.07   | 0.06   | 0.02         | 0.04    | 0.06               | 0.07    | 0.07    | 0.01   | 0.28   | 0.03   | 0.03         | 0.00 | 0.25 | 0.26 |  |  |
| A2058       | Skin            | Malignant Melanoma                                          |            | 0.00              | 0.09    | 0.07   | 0.09   | 0.05   | 0.04   | 0.02         | 0.05    | 0.04               | 0.09    | 0.06    | 0.02   | 0.29   | 0.03   | 0.02         | 0.00 | 0.25 | 0.20 |  |  |
| GAK         | Skin            | Malignant Melanoma                                          |            | 0.00              | 0.10    | 0.08   | 0.09   | 0.07   | 0.06   | 0.03         | 0.05    | 0.04               | 0.10    | 0.07    | 0.02   | 0.30   | 0.03   | 0.03         | 0.01 | 0.14 | 0.20 |  |  |
| MMAC-SF     | Skin            | Malignant Melanoma                                          |            | 0.02              | 0.10    | 0.07   | 0.09   | 0.07   | 0.07   | 0.02         | 0.06    | 0.05               | 0.10    | 0.07    | 0.03   | 0.30   | 0.03   | 0.02         | 0.00 | 0.20 | 0.19 |  |  |
| SH-4        | Skin            | Malignant Melanoma                                          |            | 0.01              | 0.12    | 0.08   | 0.09   | 0.08   | 0.06   | 0.02         | 0.04    | 0.04               | 0.08    | 0.07    | 0.01   | 0.31   | 0.04   | 0.02         | 0.01 | 0.19 | 0.18 |  |  |
| IPC-298     | Skin            | Malignant Melanoma                                          |            | 0.02              | 0.13    | 0.08   | 0.12   | 0.08   | 0.08   | 0.04         | 0.08    | 0.06               | 0.12    | 0.13    | 0.02   | 0.29   | 0.05   | 0.10         | 0.01 | 0.22 | 0.23 |  |  |
| 451LU       | Skin            | Malignant Melanoma                                          |            | 0.00              | 0.09    | 0.09   | 0.10   | 0.06   | 0.06   | 0.05         | 0.05    | 0.04               | 0.11    | 0.10    | 0.02   | 0.30   | 0.05   | 0.03         | 0.01 | 0.15 | 0.16 |  |  |
| WM-115      | Skin            | Malignant Melanoma                                          |            | 0.01              | 0.11    | 0.09   | 0.11   | 0.08   | 0.09   | 0.03         | 0.08    | 0.05               | 0.10    | 0.09    | 0.03   | 0.28   | 0.04   | 0.07         | 0.01 | 0.17 | 0.22 |  |  |
| SK-MEL-2    | Skin            | Malignant Melanoma                                          |            | 0.01              | 0.12    | 0.10   | 0.12   | 0.08   | 0.10   | 0.04         | 0.09    | 0.06               | 0.10    | 0.09    | 0.03   | 0.18   | 0.04   | 0.06         | 0.00 | 0.13 | 0.19 |  |  |
| SK-MEL-31   | Skin            | Malignant Melanoma                                          |            | 0.01              | 0.14    | 0.10   | 0.12   | 0.09   | 0.10   | 0.04         | 0.07    | 0.06               | 0.12    | 0.09    | 0.03   | 0.20   | 0.05   | 0.06         | 0.01 | 0.09 | 0.18 |  |  |
| M14         | Skin            | Malignant Melanoma                                          |            | 0.00              | 0.12    | 0.10   | 0.12   | 0.09   | 0.08   | 0.03         | 0.10    | 0.07               | 0.12    | 0.10    | 0.02   | 0.24   | 0.06   | 0.07         | 0.01 | 0.04 | 0.16 |  |  |
| WM-266-4    | Skin            | Malignant Melanoma                                          |            | 0.00              | 0.10    | 0.10   | 0.10   | 0.09   | 0.08   | 0.02         | 0.07    | 0.08               | 0.11    | 0.11    | 0.03   | 0.29   | 0.03   | 0.07         | 0.00 | 0.04 | 0.23 |  |  |
| HS-940-T    | Skin            | Malignant Melanoma                                          |            | 0.02              | 0.13    | 0.09   | 0.10   | 0.09   | 0.09   | 0.03         | 0.10    | 0.07               | 0.12    | 0.12    | 0.04   | 0.25   | 0.06   | 0.07         | 0.01 | 0.19 | 0.22 |  |  |
| HS-939-T    | Skin            | Malignant Melanoma                                          |            | 0.01              | 0.08    | 0.06   | 0.09   | 0.07   | 0.06   | 0.03         | 0.05    | 0.04               | 0.09    | 0.07    | 0.02   | 0.18   | 0.03   | 0.02         | 0.01 | 0.08 | 0.17 |  |  |
| DJM-1       | Skin            | Malignant Trichilemmal Cyst                                 |            | 0.10              | 0.10    | 0.07   | 0.09   | 0.06   | 0.06   | 0.02         | 0.05    | 0.03               | 0.08    | 0.07    | 0.01   | 0.28   | 0.06   | 0.03         | 0.01 | 0.28 | 0.31 |  |  |
| A431        | Skin            | Skin Squamous Cell Carcinoma                                |            | 0.01              | 0.12    | 0.08   | 0.10   | 0.08   | 0.08   | 0.03         | 0.09    | 0.08               | 0.08    | 0.11    | 0.02   | 0.10   | 0.04   | 0.04         | 0.01 | 0.17 | 0.26 |  |  |
| HUTU-80     | Small Intestine | Duodenum Adenocarcinoma                                     |            | 0.01              | 0.13    | 0.10   | 0.11   | 0.07   | 0.08   | 0.04         | 0.07    | 0.16               | 0.12    | 0.11    | 0.05   | 0.35   | 0.07   | 0.08         | 0.02 | 0.38 | 0.48 |  |  |
| RD          | Soft Tissue     | Bladder Carcinoma                                           |            | 0.04              | 0.10    | 0.09   | 0.11   | 0.07   | 0.08   | 0.04         | 0.06    | 0.07               | 0.11    | 0.08    | 0.03   | 0.31   | 0.05   | 0.03         | 0.01 | 0.30 | 0.28 |  |  |
| A673        | Soft Tissue     | Ewing'S Sarcoma-Peripheral Primitive Neuroectodermal Tumour |            | 0.08              | 0.11    | 0.09   | 0.10   | 0.06   | 0.07   | 0.05         | 0.06    | 0.71               | 0.43    | 0.28    | 0.17   | 0.38   | 0.28   | 0.16         | 0.19 | 0.47 | 0.42 |  |  |
| SW684       | Soft Tissue     | Fibrosarcoma                                                |            | 0.01              | 0.11    | 0.08   | 0.12   | 0.07   | 0.08   | 0.07         | 0.06    | 0.06               | 0.13    | 0.10    | 0.04   | 0.28   | 0.05   | 0.08         | 0.00 | 0.24 | 0.24 |  |  |
| HT-1080     | Soft Tissue     | Fibrosarcoma                                                |            | 0.00              | 0.14    | 0.09   | 0.11   | 0.08   | 0.08   | 0.04         | 0.07    | 0.07               | 0.10    |         |        |        |        |              |      |      |      |  |  |

|            |                           |                                     | TargetID          |            |            |            |            |            |            |            |                    |            |            |            |            |            |              |            |            |            |         |  |         |  |         |  |        |  |        |  |        |  |              |  |      |  |      |  |
|------------|---------------------------|-------------------------------------|-------------------|------------|------------|------------|------------|------------|------------|------------|--------------------|------------|------------|------------|------------|------------|--------------|------------|------------|------------|---------|--|---------|--|---------|--|--------|--|--------|--|--------|--|--------------|--|------|--|------|--|
|            |                           |                                     | UCSC_REFGENE_NAME |            |            |            |            |            |            |            | UCSC_REFGENE_GROUP |            |            |            |            |            |              |            |            |            |         |  |         |  |         |  |        |  |        |  |        |  |              |  |      |  |      |  |
|            |                           |                                     | DCP2              |            |            |            |            |            |            |            | NUDT16             |            |            |            |            |            |              |            |            |            |         |  |         |  |         |  |        |  |        |  |        |  |              |  |      |  |      |  |
|            |                           |                                     | TSS1500           |            | TSS1500    |            | TSS200     |            | TSS200     |            | TSS200             |            | TSS200     |            | TSS200     |            | 1stExon;5UTR |            | 1stExon    |            | TSS1500 |  | TSS1500 |  | TSS1500 |  | TSS200 |  | TSS200 |  | TSS200 |  | 5UTR;1stExon |  | Body |  | Body |  |
| Cell Line  | Tissue                    | Cell Line Type                      | cg21539223        | cg16456337 | cg15956794 | cg14773728 | cg17573603 | cg17919331 | cg23965551 | cg00522636 | cg13518195         | cg26459500 | cg01092811 | cg06363041 | cg25437259 | cg14506646 | cg14861803   | cg11162249 | cg17789800 | cg00261665 |         |  |         |  |         |  |        |  |        |  |        |  |              |  |      |  |      |  |
| 8305C      | Thyroid                   | Thyroid Anaplastic Carcinoma        | 0.03              | 0.12       | 0.09       | 0.11       | 0.07       | 0.11       | 0.03       | 0.07       | 0.07               | 0.12       | 0.11       | 0.04       | 0.07       | 0.05       | 0.03         | 0.01       | 0.03       | 0.19       |         |  |         |  |         |  |        |  |        |  |        |  |              |  |      |  |      |  |
| HTC-C3     | Thyroid                   | Thyroid Carcinoma                   | 0.03              | 0.12       | 0.09       | 0.11       | 0.09       | 0.08       | 0.04       | 0.08       | 0.07               | 0.12       | 0.11       | 0.03       | 0.06       | 0.05       | 0.03         | 0.00       | 0.03       | 0.19       |         |  |         |  |         |  |        |  |        |  |        |  |              |  |      |  |      |  |
| FTC-133    | Thyroid                   | Thyroid Carcinoma (Follicular)      | 0.00              | 0.13       | 0.08       | 0.11       | 0.09       | 0.08       | 0.05       | 0.07       | 0.07               | 0.10       | 0.10       | 0.03       | 0.04       | 0.04       | 0.04         | 0.01       | 0.01       | 0.19       |         |  |         |  |         |  |        |  |        |  |        |  |              |  |      |  |      |  |
| CGTH-W-1   | Thyroid                   | Thyroid Carcinoma (Follicular)      | 0.01              | 0.13       | 0.06       | 0.10       | 0.08       | 0.08       | 0.06       | 0.06       | 0.06               | 0.10       | 0.09       | 0.02       | 0.29       | 0.05       | 0.09         | 0.01       | 0.29       | 0.28       |         |  |         |  |         |  |        |  |        |  |        |  |              |  |      |  |      |  |
| K5         | Thyroid                   | Thyroid Carcinoma (Follicular)      | 0.18              | 0.14       | 0.08       | 0.11       | 0.09       | 0.10       | 0.06       | 0.08       | 0.07               | 0.11       | 0.11       | 0.03       | 0.23       | 0.05       | 0.05         | 0.01       | 0.22       | 0.25       |         |  |         |  |         |  |        |  |        |  |        |  |              |  |      |  |      |  |
| RO82-W-1   | Thyroid                   | Thyroid Carcinoma (Follicular)      | 0.62              | 0.15       | 0.10       | 0.11       | 0.08       | 0.09       | 0.06       | 0.06       | 0.06               | 0.12       | 0.10       | 0.03       | 0.17       | 0.06       | 0.05         | 0.01       | 0.15       | 0.22       |         |  |         |  |         |  |        |  |        |  |        |  |              |  |      |  |      |  |
| TT         | Thyroid                   | Thyroid Carcinoma (Medullary)       | 0.00              | 0.14       | 0.10       | 0.10       | 0.08       | 0.08       | 0.04       | 0.07       | 0.05               | 0.10       | 0.09       | 0.02       | 0.03       | 0.03       | 0.04         | 0.00       | 0.02       | 0.17       |         |  |         |  |         |  |        |  |        |  |        |  |              |  |      |  |      |  |
| BCPAP      | Thyroid                   | Thyroid Carcinoma (Papillary)       | 0.01              | 0.14       | 0.11       | 0.10       | 0.08       | 0.09       | 0.04       | 0.08       | 0.08               | 0.11       | 0.09       | 0.03       | 0.03       | 0.05       | 0.04         | 0.01       | 0.03       | 0.16       |         |  |         |  |         |  |        |  |        |  |        |  |              |  |      |  |      |  |
| BICR10     | Upper Aerodigestive Tract | Buccal Mucosa Squamous Carcinoma    | 0.01              | 0.09       | 0.07       | 0.12       | 0.08       | 0.08       | 0.03       | 0.05       | 0.04               | 0.10       | 0.09       | 0.02       | 0.30       | 0.04       | 0.03         | 0.01       | 0.21       | 0.20       |         |  |         |  |         |  |        |  |        |  |        |  |              |  |      |  |      |  |
| HSC-2      | Upper Aerodigestive Tract | Head & Neck Squamous Cell Carcinoma | 0.01              | 0.12       | 0.10       | 0.17       | 0.12       | 0.09       | 0.05       | 0.11       | 0.09               | 0.15       | 0.19       | 0.03       | 0.34       | 0.06       | 0.08         | 0.01       | 0.36       | 0.67       |         |  |         |  |         |  |        |  |        |  |        |  |              |  |      |  |      |  |
| BB49-HNC   | Upper Aerodigestive Tract | Head & Neck Squamous Cell Carcinoma | 0.04              | 0.13       | 0.08       | 0.12       | 0.08       | 0.09       | 0.05       | 0.08       | 0.07               | 0.11       | 0.14       | 0.03       | 0.31       | 0.06       | 0.09         | 0.01       | 0.31       | 0.29       |         |  |         |  |         |  |        |  |        |  |        |  |              |  |      |  |      |  |
| CA9-22     | Upper Aerodigestive Tract | Head & Neck Squamous Cell Carcinoma | 0.04              | 0.12       | 0.07       | 0.10       | 0.07       | 0.08       | 0.07       | 0.06       | 0.08               | 0.10       | 0.08       | 0.03       | 0.31       | 0.06       | 0.07         | 0.01       | 0.29       | 0.46       |         |  |         |  |         |  |        |  |        |  |        |  |              |  |      |  |      |  |
| KOSC-2     | Upper Aerodigestive Tract | Head & Neck Squamous Cell Carcinoma | 0.40              | 0.23       | 0.08       | 0.10       | 0.08       | 0.07       | 0.05       | 0.07       | 0.06               | 0.09       | 0.10       | 0.02       | 0.30       | 0.06       | 0.10         | 0.01       | 0.27       | 0.30       |         |  |         |  |         |  |        |  |        |  |        |  |              |  |      |  |      |  |
| LB771-HNC  | Upper Aerodigestive Tract | Head & Neck Squamous Cell Carcinoma | 0.01              | 0.09       | 0.06       | 0.09       | 0.07       | 0.06       | 0.04       | 0.07       | 0.05               | 0.10       | 0.07       | 0.03       | 0.29       | 0.05       | 0.08         | 0.01       | 0.29       | 0.27       |         |  |         |  |         |  |        |  |        |  |        |  |              |  |      |  |      |  |
| JHU-022    | Upper Aerodigestive Tract | Head & Neck Squamous Cell Carcinoma | 0.01              | 0.08       | 0.10       | 0.11       | 0.08       | 0.08       | 0.03       | 0.08       | 0.06               | 0.11       | 0.10       | 0.03       | 0.23       | 0.03       | 0.04         | 0.01       | 0.26       | 0.28       |         |  |         |  |         |  |        |  |        |  |        |  |              |  |      |  |      |  |
| BB30-HNC   | Upper Aerodigestive Tract | Head & Neck Squamous Cell Carcinoma | 0.09              | 0.05       | 0.06       | 0.08       | 0.06       | 0.07       | 0.03       | 0.06       | 0.07               | 0.09       | 0.08       | 0.02       | 0.28       | 0.03       | 0.03         | 0.01       | 0.31       | 0.24       |         |  |         |  |         |  |        |  |        |  |        |  |              |  |      |  |      |  |
| CAL-33     | Upper Aerodigestive Tract | Head & Neck Squamous Cell Carcinoma | 0.24              | 0.13       | 0.08       | 0.11       | 0.08       | 0.08       | 0.06       | 0.07       | 0.06               | 0.09       | 0.10       | 0.02       | 0.30       | 0.06       | 0.10         | 0.01       | 0.32       | 0.47       |         |  |         |  |         |  |        |  |        |  |        |  |              |  |      |  |      |  |
| HO-1-U-1   | Upper Aerodigestive Tract | Head & Neck Squamous Cell Carcinoma | 0.01              | 0.07       | 0.07       | 0.11       | 0.08       | 0.08       | 0.04       | 0.06       | 0.07               | 0.14       | 0.08       | 0.03       | 0.30       | 0.02       | 0.03         | 0.00       | 0.30       | 0.24       |         |  |         |  |         |  |        |  |        |  |        |  |              |  |      |  |      |  |
| BHY        | Upper Aerodigestive Tract | Head & Neck Squamous Cell Carcinoma | 0.01              | 0.07       | 0.09       | 0.10       | 0.07       | 0.08       | 0.02       | 0.06       | 0.05               | 0.11       | 0.09       | 0.02       | 0.23       | 0.03       | 0.03         | 0.01       | 0.33       | 0.21       |         |  |         |  |         |  |        |  |        |  |        |  |              |  |      |  |      |  |
| FADU       | Upper Aerodigestive Tract | Hypopharynx Squamous Cell Carcinoma | 0.27              | 0.17       | 0.08       | 0.11       | 0.09       | 0.08       | 0.10       | 0.07       | 0.07               | 0.09       | 0.10       | 0.02       | 0.26       | 0.07       | 0.08         | 0.01       | 0.25       | 0.48       |         |  |         |  |         |  |        |  |        |  |        |  |              |  |      |  |      |  |
| BICR22     | Upper Aerodigestive Tract | Metastasis From Lymph Node          | 0.06              | 0.07       | 0.09       | 0.10       | 0.07       | 0.07       | 0.04       | 0.07       | 0.06               | 0.10       | 0.08       | 0.02       | 0.28       | 0.03       | 0.02         | 0.00       | 0.24       | 0.22       |         |  |         |  |         |  |        |  |        |  |        |  |              |  |      |  |      |  |
| KON        | Upper Aerodigestive Tract | Mouth Squamous Cell Carcinoma       | 0.06              | 0.15       | 0.07       | 0.10       | 0.08       | 0.08       | 0.05       | 0.07       | 0.06               | 0.11       | 0.08       | 0.02       | 0.34       | 0.06       | 0.10         | 0.01       | 0.27       | 0.23       |         |  |         |  |         |  |        |  |        |  |        |  |              |  |      |  |      |  |
| HN         | Upper Aerodigestive Tract | Mouth Squamous Cell Carcinoma       | 0.00              | 0.12       | 0.08       | 0.10       | 0.08       | 0.08       | 0.05       | 0.08       | 0.06               | 0.09       | 0.09       | 0.03       | 0.03       | 0.05       | 0.05         | 0.01       | 0.06       | 0.30       |         |  |         |  |         |  |        |  |        |  |        |  |              |  |      |  |      |  |
| HO-1-N-1   | Upper Aerodigestive Tract | Mucoepidermoid Carcinoma            | 0.01              | 0.08       | 0.09       | 0.11       | 0.07       | 0.07       | 0.02       | 0.06       | 0.05               | 0.12       | 0.08       | 0.03       | 0.03       | 0.03       | 0.01         | 0.01       | 0.01       | 0.13       |         |  |         |  |         |  |        |  |        |  |        |  |              |  |      |  |      |  |
| JHU-011    | Upper Aerodigestive Tract | Ns                                  | 0.05              | 0.15       | 0.07       | 0.07       | 0.07       | 0.07       | 0.04       | 0.06       | 0.05               | 0.10       | 0.09       | 0.02       | 0.22       | 0.04       | 0.06         | 0.02       | 0.28       | 0.25       |         |  |         |  |         |  |        |  |        |  |        |  |              |  |      |  |      |  |
| PCI-30     | Upper Aerodigestive Tract | Ns                                  | 0.03              | 0.06       | 0.06       | 0.08       | 0.08       | 0.06       | 0.04       | 0.06       | 0.07               | 0.09       | 0.08       | 0.01       | 0.25       | 0.03       | 0.04         | 0.00       | 0.26       | 0.31       |         |  |         |  |         |  |        |  |        |  |        |  |              |  |      |  |      |  |
| PCI-15A    | Upper Aerodigestive Tract | Ns                                  | 0.06              | 0.14       | 0.10       | 0.10       | 0.09       | 0.08       | 0.05       | 0.08       | 0.06               | 0.12       | 0.09       | 0.03       | 0.19       | 0.05       | 0.07         | 0.01       | 0.29       | 0.30       |         |  |         |  |         |  |        |  |        |  |        |  |              |  |      |  |      |  |
| PCI-6A     | Upper Aerodigestive Tract | Ns                                  | 0.03              | 0.14       | 0.08       | 0.10       | 0.06       | 0.09       | 0.06       | 0.07       | 0.09               | 0.11       | 0.10       | 0.03       | 0.04       | 0.04       | 0.04         | 0.01       | 0.02       | 0.17       |         |  |         |  |         |  |        |  |        |  |        |  |              |  |      |  |      |  |
| PCI-4B     | Upper Aerodigestive Tract | Ns                                  | 0.05              | 0.14       | 0.11       | 0.11       | 0.08       | 0.09       | 0.04       | 0.08       | 0.07               | 0.10       | 0.10       | 0.03       | 0.03       | 0.07       | 0.04         | 0.01       | 0.23       | 0.21       |         |  |         |  |         |  |        |  |        |  |        |  |              |  |      |  |      |  |
| BICR78     | Upper Aerodigestive Tract | Oral Alveolus Squamous Carcinoma    | 0.02              | 0.14       | 0.08       | 0.09       | 0.08       | 0.07       | 0.05       | 0.07       | 0.06               | 0.11       | 0.09       | 0.03       | 0.33       | 0.06       | 0.09         | 0.01       | 0.28       | 0.30       |         |  |         |  |         |  |        |  |        |  |        |  |              |  |      |  |      |  |
| SAT        | Upper Aerodigestive Tract | Oral Squamous Cell Carcinoma        | 0.01              | 0.09       | 0.06       | 0.09       | 0.06       | 0.06       | 0.06       | 0.04       | 0.04               | 0.09       | 0.08       | 0.01       | 0.29       | 0.05       | 0.03         | 0.00       | 0.19       | 0.39       |         |  |         |  |         |  |        |  |        |  |        |  |              |  |      |  |      |  |
| SKN-3      | Upper Aerodigestive Tract | Oral Squamous Cell Carcinoma        | 0.00              | 0.07       | 0.09       | 0.09       | 0.08       | 0.08       | 0.00       | 0.08       | 0.07               | 0.09       | 0.10       | 0.01       | 0.02       | 0.04       | 0.01         | 0.00       | 0.03       | 0.13       |         |  |         |  |         |  |        |  |        |  |        |  |              |  |      |  |      |  |
| PE-CA-PJ15 | Upper Aerodigestive Tract | Oral Squamous Cell Carcinoma        | 0.07              | 0.15       | 0.09       | 0.10       | 0.07       | 0.08       | 0.05       | 0.08       | 0.06               | 0.11       | 0.09       | 0.04       | 0.29       | 0.07       | 0.08         | 0.01       | 0.34       | 0.56       |         |  |         |  |         |  |        |  |        |  |        |  |              |  |      |  |      |  |
| DETROIT562 | Upper Aerodigestive Tract | Pharynx Carcinoma                   | 0.06              | 0.07       | 0.10       | 0.12       | 0.08       | 0.08       | 0.04       | 0.07       | 0.08               | 0.11       | 0.09       | 0.03       | 0.25       | 0.03       | 0.03         | 0.01       | 0.27       | 0.25       |         |  |         |  |         |  |        |  |        |  |        |  |              |  |      |  |      |  |
| HCE-T      | Upper Aerodigestive Tract | Sinus Squamous Cell Carcinoma       | 0.01              | 0.10       | 0.09       | 0.09       | 0.07       | 0.07       | 0.02       | 0.08       | 0.06               | 0.12       | 0.13       | 0.02       | 0.28       | 0.04       | 0.04         | 0.01       | 0.29       | 0.23       |         |  |         |  |         |  |        |  |        |  |        |  |              |  |      |  |      |  |
| RPMI-2650  | Upper Aerodigestive Tract | Squamous Cell Carcinoma             | 0.01              | 0.08       | 0.08       | 0.10       | 0.08       | 0.07       | 0.03       | 0.07       | 0.47               | 0.46       | 0.18       | 0.10       | 0.44       | 0.30       | 0.17         | 0.25       | 0.40       | 0.43       |         |  |         |  |         |  |        |  |        |  |        |  |              |  |      |  |      |  |
| DOK        | Upper Aerodigestive Tract | Tongue Dysplasia                    | 0.05              | 0.08       | 0.08       | 0.12       | 0.08       | 0.08       | 0.03       | 0.06       | 0.06               | 0.11       | 0.08       | 0.04       | 0.08       | 0.04       | 0.02         | 0.00       | 0.12       | 0.22       |         |  |         |  |         |  |        |  |        |  |        |  |              |  |      |  |      |  |
| CAL-27     | Upper Aerodigestive Tract | Tongue Squamous Cell Carcinoma      | 0.32              | 0.11       | 0.08       | 0.10       |            |            |            |            |                    |            |            |            |            |            |              |            |            |            |         |  |         |  |         |  |        |  |        |  |        |  |              |  |      |  |      |  |
